# Supplementary material for: Low-Level, Liquid-Only and Mixed-Phase Cloud Identification byPolarimetric Lidar
Source: Copernicus journal article supplement (doi:10.5194/amt-2016-303), 2016-11-30
Supplement: Supplementary file [file amt-2016-303-AC1-supplement.pdf]

## Author's Response to Reviewers Comments (Review 1)

**Title:** Low-Level, Liquid-Only and Mixed-Phase Cloud Identifications by Polarimetric Lidar

The authors would like to first thank the reviewers for their thoughtful and constructive comments on our manuscript. After discussion with coauthors, it was decided to complement this manuscript submission with a second manuscript to AMT. We realized after this review that the papers are not two manuscripts but two parts of the same. This current manuscript focuses on the observations and classification scheme while the second manuscript combines all the possible lidar observations into a best estimate cloud product and validates this product with co-located sensors resulting in a unique interpretation of cloud effects on the surface radiation budget. As such, we have changed the title of this manuscript and have included results from the second manuscript in this document to address the comments from this review of the first manuscript. The title of the companion manuscript is "Identifying and Characterizing the Properties of Arctic Clouds Using Enhanced Polarimetric Lidar. Part 2: Data Merging and Interpretation", and was submitted to AMT (on April 13, 2017) and should be accessible soon through the online portal.

The comments, taken from the provided reviews, have been copied in bullet format and addressed in the sub-bullets. A draft of the changes is also included where omissions are marked with **red** and additions are given in **blue**.

- Comment
  - Response

### Reviewer 3

- The submitted manuscript does not provide an objective validation about which measurement strategy is more accurate
  - Owing to the uniqueness of the polarimetric lidar data set, the need for a careful evaluation of signals, and the unique cloud conditions over Summit Greenland, this first paper focuses on methods to best retrieve cloud properties in the context of the lidar's four polarization states using both photon and analog signal detection schemes. This measurement arrangement provides an overdetermined condition for estimating cloud phase, thus, enabling an internal validation of signals leading to optimal selection for science investigations. An internal validation is achieved by understanding the limitations of these signals and how these limitations may impact the estimate of cloud properties. This must be known before expanding the measurements to an objective validation of the technique and before using the results for scientific investigation. By taking this approach, this first manuscript elucidated common pitfalls of traditional lidar measurements in characterizing cloud properties, demonstrated a more optimal approach using non-orthogonal polarization measurements, generalized the theory of Neely et al. 2013, and provided a more definitive means of identifying what is a system effect and what is an effect associated with cloud properties. These findings enable the next step of performing an objective validation of the CAPABL data product. To address this need, the second manuscript, identified as "Part 2: Date Merging and Interpretation", has been submitted in parallel with this paper. The Part 2 manuscript invokes co-located remote sensing instrumentation to provide the objective validation and interpretation of the lidar results with new findings on cloud effects on surface radiation budgets at Summit.
- The submitted manuscript does not adequately discuss the implication that this work might have on previous statistics of cloud phase using different lidars. I suggest to add a short review on

measurements made by other lidar systems. The main question is how other lidars acquire depolarization? Is either “analog detection” and “photon counting” the norm? Are the errors shown here also expected for other lidars? Are statistics from previous lidars biased and are they inconsistent because different lidar systems were used? What are typical dynamic ranges for lidars? Such a discussion would improve the relevance of this paper. This context should also be repeated in the conclusions and abstract.

- The manuscript demonstrates common issues/errors that arise in cloud property estimates using conventional lidar systems that employ two-channel, orthogonal polarizations measurements with either photon counting or analog signal detection. The demonstrated issues/errors are not testable using such conventional systems because there are insufficient measurement options to identify system effects versus geophysical effects. Consequently these systems cannot identify or quantify when their derived cloud properties are biased or in error. Our system setup provides the unique opportunity to test common assumptions and to optimize the system performance for improved confidence in cloud property retrievals. For example, the misidentification of liquid-only clouds as ice due to different system effects on the co-polarized and cross-polarized is a problem that our system can identify and mitigate.

Due to varying configurations and approaches by other lidars, we cannot specifically identify how well other systems have represented cloud properties. However, we identify potential shortcomings and introduce methods for other lidar systems to employ to identify and mitigate these system effects. Our goal is to provide a careful and complete analysis in this Part 1, by which, the second manuscript, Part 2, can leverage to study the derived cloud properties on the surface radiation budget.

- The importance of the measurement errors relative to other expected errors, especially those from multiple scattering, should be better discussed.
  - A slight bias due to multiple scattering is observed in Figure 6, but as mentioned in the text in Section 4.3 it is common to all observation types made by CAPABL. Multiple scattering does not affect the implications of these measurements because the measured values all respond similarly. However, multiple scattering does cause changes in the best estimate cloud product and is directly addressed in the second manuscript, Part 2. By directly comparing CAPABL measurements to a co-located micropulse lidar with a  $100\ \mu\text{rad}$  field of view over a 6 month trial period where both systems have better than 94% uptime, the bias described can be measured. That paper concludes that fewer than 5.5% of cloud liquid voxels are affected by multiple scattering.
- Suggest bringing the definitions of analog and photon counting and multiple scattering forward from Section 3.
  - The authors agree with the reviewer. Multiple scattering has now been inserted in Section 2.3 and is still addressed in 4.3. The definitions of analog and photon counting have now been inserted in Section 2.2 and are still further addressed in Section 3.
- Although the issue of multiple scattering is discussed, in my opinion it needs to be quantified more. How do the increases in depolarization due to multiple scattering relate to the biases discussed in the paper?
  - Multiple scattering serves to bias all channels and thus cannot be uniquely isolated and removed without more information. Multiple scattering is addressed therefore in part 2 of this manuscript where CAPABL is directly compared to a lidar with much smaller field of view where the multiple scattering is suppressed. Over a 6-month period used for validation, multiple scattering affects fewer than 5.5% of all cloud voxels and does not affect the column data product at all (upon which Figure 7 is based). Multiple scattering tends to increase depolarization and causes liquid cloud tops to look like ice. As such, the column of data still contains liquid in every case and is thus tagged as liquid for the

column data product used in Figure 7 for example. The voxel height results presented in Figure 6 contain a small bias, less than 5% but this bias is constant across all 6 measurement types and as such does not affect the conclusion about altering medians due to saturation.

- It is stated about polarimetric lidar that “If not properly designed or considered, measurements can be misinterpreted casting doubt on critical measurements like cloud phase.” Are there references backing up this statement? More discussion on previous studies is needed to place the current work into context.
  - The authors have added citations to Hayman and Thayer 2009 who find systematic depolarization bias due to optical retardance, Liu et al. 2009 who claim improvements in wind and aerosol measurements by considering saturation, and Neely et al. 2013 who consider saturation in their calculation of diattenuation.
- Much of the analysis in section 2 is in terms of “count rates”. Could you please relate/convert this quantity to any physical value that lidar users might be accustomed to?
  - Count rates are defined in our appendix equation A2 relative to the raw lidar signals. Furthermore, saturation behavior is defined in terms of count rate by other authors (ex: Donovan 1993). The authors define signals in terms of count rates to facilitate a simple calculation of per shot photons per second making it a value independent of our specific system. This allows direct comparison between systems without having to consider different system specifications. The authors know of no other way to generalize signal levels in terms of observational values and related to saturation.
- Please discuss in which situations ‘high’ count rates are to be expected.
  - Many scenarios exist but in the context of this work, high count rates and correspondingly high dynamic range, occur primarily in low liquid cloud environments due to their small range and efficient scattering. A paragraph at the end of Section 4.1 is added to describe where one would expect saturation issues related to high count rates to appear.
- Obvious differences are seen between the results with different measurements techniques. However, there is no objective verification of which of the results is most realistic.
  - Our overdetermined measurement scheme allows for internal verification of which signals are being biased and which are not. For example, a different combination of signals is determined to measure high thin clouds, low thick clouds, or clear air, which all produce very different signal intensities especially when considering different polarizations. A best estimate data product is developed and validated in Part 2 of this work but is defined based on the results of the internal validation presented in this paper. The Part 2 paper then provides the objective verification using multisensor observations to confirm the lidar cloud classification scheme.
- Figure 6 then presents results in terms of cloud height statistics. Again, the differences are clear, but I do not see how these are validations of the methods. Both liquid and ice can be present below 4km, depending on temperatures (Intrieri et al, 2002), so all the statistics seem plausible to me. I suggest to remove this figure. Figure 7 suffers from the same problem as Figure 6.
  - The authors include Figure 6 and 7 to quantitatively assess the differences the 6 introduced processing methods can have on signals scattered from the same volume. This internal validation effectively establishes a direct link between lidar processing methods and errors in attribution of cloud properties presented in Section 6.2. The quantification of these differences is required to define the best possible method to optimize from the overdetermined six signal approach. The results of Figure 7 illustrate where certain signals are deficient and how a best estimate can be retrieved. For example, analog detection systematically underestimates cloud fraction (too much clear air compared to the best estimate product defined in Paper 2) and photon counting systematically

underestimates liquid cloud types (compared to the best estimate product defined in Paper 2)). Without the available signal options, none of the types of data presented are without bias given the variety of cloud types experienced at Summit.

An extension of Figure 7 from the text is shown here using the best estimate product from paper 2 to support the above statements.

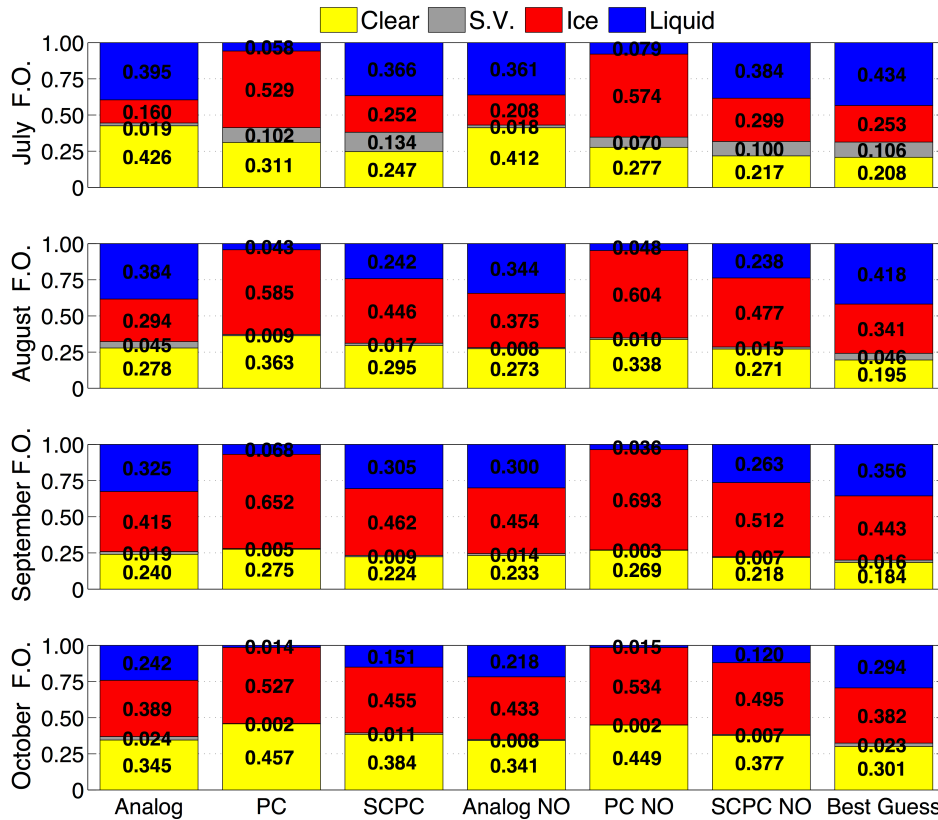

- Section 2.2 offers a rather technical discussion on dynamic range. As an example, measurements in clear air are used. It is stated that “to measure clear air from 50m to 10 km would require no less than 6 orders of magnitude.” These “clear air” measurements are of course very different from the targeted measurements in clouds. It is unclear how this discussion relates to measurement requirements and errors for cloud cases. Is this a best or worst case scenario? Elsewhere in the paper (page 17), optically thick clouds are referred to as “high dynamic range targets”, so could we expect larger dynamic ranges?
  - Clear air is used and described because it provides a smooth transition from high signal strength to low signal strength in a known and quantifiable way-meaning the scattering and its behavior with altitude is constrained. Clouds, on the other hand, can produce the same range of signal strengths as clear air but can vary from voxel to voxel due to unknown scattering properties – in fact, this is the very thing we are trying to quantify. By using clear air we can understand these signal ranges and system responses while having a firm understanding of the scattering. For example, air molecules at these wavelengths produce very little depolarization, less than 1%. Thus, a measure of depolarization from clear air gives us a clear determination of the system’s depolarization performance. Depolarization of 1% , for example, indicates some weak system depolarization. For CAPABL it is expected that the system induced depolarization is approximately 0.8%. However, this number is tolerable given the thresholds we impose on depolarization for estimating cloud type. For example, liquid cloud targets have

depolarization values of approximately  $< 11\%$  in the CAPABL data set. A clear 1-2 orders of magnitude of polarization-induced dynamic range is involved. If the depolarization is to be estimated for such low values, then the co-polarized and cross-polarized signals must differ by 2 orders of magnitude. This imposes a constraint on which signals are best to accommodate this range in signals. The signal dynamic range is compounded further by the variety in cloud base heights leading to range-dependent signal strengths along with varying cloud optical depths. The clarifying sentence: “Note that clear air and liquid bearing clouds both have high polarization-induced dynamic range, i.e. low depolarization ratio, but liquid bearing clouds have more rapid attenuation of signal, which is not strictly range-induced dynamic range but rather attenuation from transmission terms of the SVLE” is now included in Section 2.2

- In equation 1, should the transmission not be a function of wavelength too?
  - The reviewer is correct that transmission is a sensitive function of wavelength. This is indicated in the equation by the dependence on the wave vector that points in the direction of light propagation and has a magnitude equal to the wavenumber  $|\vec{k}| = 2\pi/\lambda$ .
- Page 4, line 19: Please place equation 2 here in the text, embedded in a sentence. Please use this common style of equations embedded in sentences throughout the paper.
  - The equation is now imbedded. Equations 2, 3, 4, 5, 6, 7, 8, and 9 and Appendix A1, A2, A3, and A4 have also been changed.
- Page 4, line 20: Please define what is meant with “tilt angle”. Also, I suggest to change “polarization” to “polarized signal” in this sentence (in 2 places).
  - The authors agree that the statement is unclear. The reference to system tilt is removed as it is unnecessary. Details on the system orientation are given in Section 3. “Polarization” has been changed to “polarized signal”.
- Page 5, line 4: I am not sure what is meant with “which is not a function of range but only receive polarizations”. Is there a part missing? Please correct.
  - The sentence has been rewritten to clarify that that matrix  $A$  and inverse  $A^{-1}$  are not functions of range. The  $A$  matrix is only a function of the receiver configuration.
- Page 5, Eqs. 4, 5, 6 and 7. Please embed these in a sentence.
  - These equations are now imbedded.
- Page 6: I am puzzled what is meant with: “If one were to consider the differences in signal strength of a depolarization ratio of 1% vs. 100%, there is substantial variations as well.” Please rephrase.
  - This sentence has been removed.
- Page 6 and other places: I suggest to add “of signal” after “orders of magnitude” everywhere in the paper.
  - The orders of magnitude are now tied to those that are linked directly to the signal and those that are linked to the observing capacity of the system.
- Section 2.3: Please cite the paper by Gimmestad (Appl. Opt. 47, 3795-3802, 2008) and relate the definitions of depolarization used here to those discussed by Gimmestad.
  - References to Gimmestad and references that are cited therein and references that cite and advance the definition of depolarization by Gimmestad are included in a paragraph at the end of section 2.1. Depolarization  $d$  used by the authors is consistent with the definitions presented by Gimmestad 2008, Flynn et al. 2007, and Hayman and Thayer 2009, 2012.
- Page 7, line 6: Here it is stated that “These are the theoretical arrival rates and not the observed arrival rates.” This is a confusing statement, since the ones described in Eq. 9 are still theoretical. Please rephrase this statement.

- The sentence specified is modified to clarify that  $S_{0\perp}$  and  $S_{0\parallel}$  are theoretical arrival rates where Equation 9 is used to relate theoretical arrival rates to possible observed depolarization errors based on theoretical models of saturation behavior.
- Page 7: Please define “non-paralyzable system”
  - A non-paralyzable counting system is specified as a theoretical model to link theoretical photon arrival rates to observed photon arrival rates. Additionally, a further note is now: “Note that the non-paralyzable model assumes that it takes some finite time for the photon counting system to reset before it can count another photon and is correct for CAPABL’s photon counting system based on the analysis provided in Appendix A.”
- Page 7, line 24: Please note in the paper that the threshold of 0.11 is very arbitrary. Theoretical values for most ice crystals are much higher (e.g., Noel et al, Appl. Opt., 41, 4245– 4257, 2002). Also, mixing of aerosols could lead to misclassifying ice cloud (precipitation) as liquid, as shown by Bourdages et al. (Atmos. Chem. Phys., 9, 6881– 6897, 2009) and Van Diedenhoven et al. (J. Appl. Meteorol. Climatol., 50, 2184-2192, 2011). Values around 0.1-0.2 might be commonly used, but they are not very robust.
  - The authors have re-analyzed the entire data set presented with depolarization thresholds from 0.05 to 0.30 with 0.01 spacing. Plotted below is the fractional occurrence of liquid and ice measured for July 2015 from the analog detection channel. Above approximately  $\delta_o = 0.11$ , the fractional occurrence stabilizes until approximately  $\delta_o = 0.20$ . Beyond that point, ice clouds are being lumped into the water fractional occurrence. Any value  $0.11 \leq \delta_o \leq 0.20$  will yield similar conclusions for fractional occurrence change. From this we conclude that  $\delta_o = 0.11$  is a reasonable threshold to use for the CAPABL data set and based on available literature.

The Bourdages et al. reference is compelling and certainly worth considering. Over the 4-month data period presented, it doesn’t appear that any precipitating hydrometeors (defined using the mean Doppler velocity as measured by a co-located millimeter cloud radar) are classified as liquid. Additionally, the findings of papers such as Morrison et al., Nature Geo., 5, 1, 11-17, 2012 suggest that in the Arctic liquid hydrometeors are too small to be efficiently precipitated. The validation study in Part 2 of this manuscript confirms that the radar measured mean Doppler velocity of liquid is lower than both randomly and preferentially oriented ice by a factor of at least 1.5.

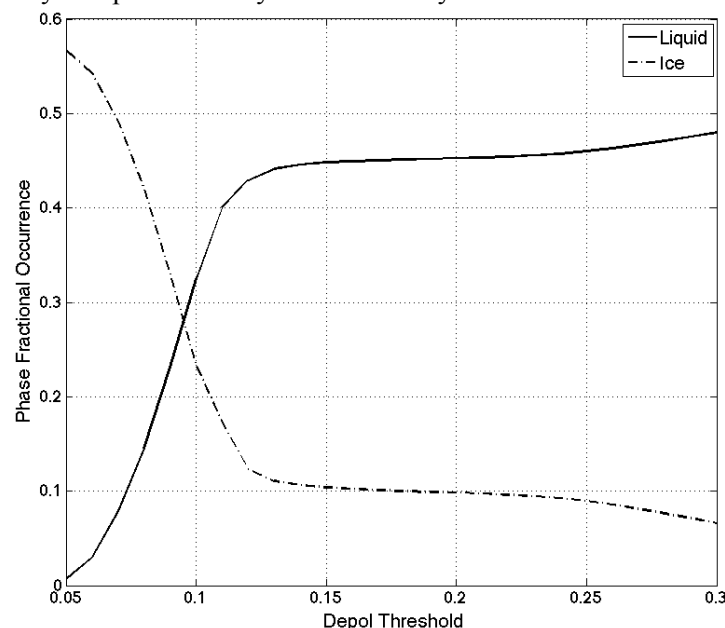

- Page 8: last sentence: What are “noise mitigating discriminators”? Is there a reference for this?
  - A reference to Donovan et al. 1993 is included, which describes the added SNR advantage of photon counting.
- Page 9, line 10: I assume the range should be 0.03-0.11.
  - The authors agree. We have changed this typo.
- Page 10, last sentence: Please define backscattering ratio. Is backscattering ratio also affected by the measurement method?
  - Backscattering ratio is now defined in the text as the ratio of total to molecular scattering. The backscattering ratio is dependent on the derivative of the lidar signal, which is susceptible to saturation. Strong saturation causes bleaching (here we mean severe under-representation or low bias) of backscatter ratio due to a nullification of the derivative of interest needed for the Klett type inversion. This is observed frequently by photon counting methods and is discussed in detail in the validation study presented in Part 2 of this work especially related to low level (lower than 200-300 meters) fog and clouds.
- Page 11, line 3: The backscatter cut-offs (26, and 50) are mentioned here, but discussed in the next section. Please move the discussion upward.
  - Following the reviewer’s suggestion, all the bounds and the rational for the bounds are now combined and listed in Section 4.2. Section 4.1 has been renamed to “Processing Methods”.
- I suggest to rename the “sub-visual” class to “aerosols” as it is confusing later when it is stated that these do not contain any ice or liquid. In any case, the distinction between clear-sky and subvisual is not very clear and might be very arbitrary. I would suggest combining them.
  - Clear air and the sub-visible mask have now been combined. Figures 3, 4, and 7 now reflect this change.

#### Reviewer 4

- Much of the data processing and analysis seems to follow directly from Neely et al., 2013. The authors would also need to address the novelty of the revised submission in the context of the prior instrument paper (Neely et al., 2013). Section 2 (Polarization Theory) is superfluous and should be removed. The few equations and definitions that could be considered relevant to the data analysis (e.g., Eqns. 6, 7, 8, and maybe 9) can easily be rolled into Section 4 (Data Analysis and Cloud Phase Identification).
  - The expressions given in Section 2 are more general, and therefore more broadly applicable, than the analysis presented by Neely et al. 2013. Both are based on the theory of Hayman and Thayer 2012. The processing presented by Neely et al. 2013 cannot accommodate non-orthogonal retrievals as applied here but can be retrieved easily from this generalization. This is clarified with the sentence: “The expressions given in Eq. 6 and Eq. 7 are generalizations of the equations presented by Neely et al. (2013) that assumed fixed receiver polarization angles.” Given that the analysis does not follow trivially from Neely et al. 2013, the authors believe it should be clearly stated.
- Throughout the paper, the authors repeatedly bring up interesting science questions that are important for the data analysis and interpretation, but then summarily dismiss these considerations as beyond the scope of this paper. This sort of writing is weak, and the paper (and its scientific contribution) would be made all the much better if the authors were to delve more deeply into these issues.
  - Much of the requested science results are presented in Part 2 of this work. However, the combination of signals and best estimate data product to be used for science investigation are predicated on the close examination of the various signals presented in this part of the work. Our unique measurement scheme enables an improved cloud data product by over determining the estimate of depolarization and diattenuation. The best estimate data product cannot be defensibly defined without carrying out the detailed optimization presented in this work, and have not been specified in the literature.
  - We have included in Section 6.2 a discussion of how improper cloud classification can cause erroneous estimates of radiative forcing. For example, using photon counting observations improperly can cause an error in longwave cloud radiative forcing of approximately  $10\text{W/m}^2$ . Miller et al. (2015) finds an average of  $33\text{W/m}^2$  for cloud radiative forcing at Summit suggesting that using uncorrected CAPABL data to infer radiative impacts could under-represent forcing by as much as one third.
- Since, in my opinion, the current scope of the paper is not necessarily worthy of publication, tackling some of these issues in a novel way would improve my review of the paper. Specific topics include: a) Constant bias in detector signal associated with multiple scattering, Pg. 12, Ln. 14-20: b) Optimum combination of orthogonal/non-orthogonal depolarization channels, Pg. 14, Ln., 30-32: c) Signal depolarization caused by multiple scattering of liquid droplets, Pg. 16, Ln. 23-32.
  - The effect of multiple scattering and optimum combination of receiver signals are both addressed in Part 2 of this manuscript. It is the authors’ opinion that multiple scattering cannot be defensibly analyzed without removing the confounding effects related to saturation, which are calculated in this work. Similarly, the optimum combination of signals is based on the signal count rate limitations shown here to cause biases in cloud voxel height and fractional occurrence. The findings of Part 2 are: multiple scattering causes biases on the order of 5% of cloud voxels whereas saturation induced errors are upwards of 30%, and that the merged data product results in 27% increase in observable voxels using all 6 types of signals defined here with no net phase bias as compared to a co-located micro-pulse lidar.



- The discussion on “gluing” at the top of Pg. 15 seems unnecessary since this method is not actually applied in this paper.
  - The author’s agree. The section has been removed.
- There is no discussion of how lidar design properties influence cloud phase classification in this manuscript. The conclusion is the first place that power aperture and field of view are mentioned in the manuscript. I don’t follow how cloud base height influences the cloud phase classification – I would think that the signal attenuation and the range of the feature of interest would be much more important than if the cloud base is at, e.g., 500 m or 1000 m.
  - The Stokes vector lidar equation presented in Section 2 is the major linking feature to design parameters. We show that base height is linked to depolarization errors through its impact on receiver dynamic range. As the cloud base varies, the saturation in photon counting detection varies and is not constant for a given count rate or depolarization ratio as shown in our figure 2. The sentence referenced by the reviewer has been modified to clarify that count rate links directly to depolarization ratio errors, which have non-negligible effect on cloud classification.
- I’m not sure what this key point means, nor why two-channel polarization lidars are particularly problematic. Recognizing signal diversity in order to flag is not a particularly strong finding.
  - The two channel polarization measurements are not particularly problematic but their interpretation of cloud properties can be unknowingly incorrect depending on the cloud conditions. The purpose of the paper is not to provide a quality flag but to illustrate and quantify under what conditions certain signals bias the estimate and how signal diversity can be employed to improve the cloud classification. Using multiple polarization measurements overdetermines the estimate of depolarization and can then be used dynamically and autonomously to select the proper combination for the given cloud conditions. This increases the confidence in the retrieved cloud classification and improves the overall data availability by almost 27% (as discussed in Part 2 of this work). That is simply a result of the minimization of available dynamic range by selecting polarization components with very different signal dynamic ranges. Additionally, as diattenuation is a sensitive measure of saturation, it can be used to further improve cloud classification.
- What is meant by the phrases can be “handled more judiciously” or makes “the characterization of cloud types more accountable”?
  - Here we simply mean that depolarization can be of geophysical origin or a result of limitations of the observational system. We recognize that depolarization is a mix of both and we use the diattenuation product  $D_1 D_2$  to identify where saturation is causing errors with depolarization measurements. Section 6.3 is added to clarify this point.
- On Pg. 17, Ln. 29-30, it is reported that the polarization configuration and signal combination allow the instrument to self-analyze limitations in a channels performance and correct some of the behavior. How is this self-analysis and correction done?
  - Self analysis relates to the systematic tagging of saturation via diattenuation. It is shown to be a sensitive indicator of saturation. The inversions in Section 2 show a need for only 3 polarization measurements. However, 4 measurements are made. The  $F_{12}$  term of the scattering matrix is measured twice with retrievals of opposite sensitivity to saturation then multiplied together. Only non-zero diattenuation with the same sign is physical where the areas with negative product are caused by saturation. Voxels with negative diattenuation products are removed. In the case of saturation issues, the merging procedure presented in Part 2 uses the weakest signals using non-orthogonal retrievals to attempt to correct for saturation of the strongest channel. This correction stage is only necessary if the standard retrievals fail. This is clarified at the end of Section 4.1 and with the addition of Section 6.3.

- The recommendations for future analysis on Pg. 18, Ln. 10-13 sound great, and it's disappointing that none of these efforts were included in this paper. Are there other ancillary measurements of this kind at Summit that can be used to independently evaluate the lidar retrievals and assess the accuracy of the cloud phase discrimination? If so, I would strongly encourage the authors to incorporate such data into evaluating their lidar retrievals.
  - The recommendations presented in this paper are addressed in detail in Part 2 of this work. Co-located millimeter cloud radar, micropulse lidar, microwave radiometer, and radiation measurements are used to analyze the best estimate retrieval of CAPABL. By making the paper a 2 part series, these results are linked.
- The terminology in Figures 3 and 4 is confusing and requires clarification on what exactly is being presented. I assume that "Total Backscatter" is really the "Total Attenuated Backscatter" or has an inversion been applied here beyond just adding the two channels to each other? Similarly, the label "Depolarization (F33)" seems inconsistent with  $d$  as in Eqn. 6, and the same inconsistency seems to apply for "Diattenuation (F12)" and  $D$  in Eqn. 7. It's unclear what is meant by Backscattering Ratio (e.g., ratio of backscatter coefficient to molecular scattering coefficient, or ratio of attenuated backscatter coefficient to molecular scattering coefficient) and how the inversion technique of Klett (1981) was applied here – does the inversion account for both particle and molecular attenuation or just the molecular? If particle attenuation is removed, then how was the inversion carried out (e.g., starting at high altitude or low altitude)? What lidar ratios were assumed? Last, it would be helpful to have the units for all of these graphs, and to report backscatter coefficient in terms of the more traditional  $\text{km}^{-1} \text{sr}^{-1}$  rather than photon count rate.
  - The authors agree and have clarified the figures. Total backscatter is now listed as Relative Backscatter. No inversion is applied to correct for attenuation or range correcting. Depolarization is now listed as  $d$  to stay consistent with the definition of Gimmetstad 2008. Diattenuation is now consistent with the text where it is calculated twice and multiplied. Backscatter ratio is as calculated by Neely et al. 2013 and is labeled  $R$ . The calculation is listed in the text as well.
- At the end of the day, what key finding or recommendation or technique is provided by this paper that allows someone like me to better employ a polarization-sensitive lidar to accurately determine cloud phase? How does the technique employed here compare to, or improve upon, the cloud phase retrieval techniques employed by other polarization-sensitive lidars, e.g., the CALIOP lidar?
  - Ground based lidar systems observing the low troposphere like CAPABL suffer from an enormous dynamic range resulting from the solid angle term of the Stokes vector lidar equation that is not experienced by space based lidar systems. As highlighted in section 2.2, the range from 50 meters to 5 km is 2 orders of magnitude greater than from 10 km to 100 km. All else being equal, this places a higher demand on the observing system because range-induced dynamic range is a more substantial fraction of the overall dynamic range. This work highlights that non-orthogonal polarization retrievals can reduce the dynamic range requirement of polarization lidar signals, which enhance their overall range. Our findings illustrate how adding at least a 3<sup>rd</sup> and more ideally a 4<sup>th</sup> polarization channel can be used to understand when saturation is affecting measurements and quantifies the effect. Only by adding more polarization channels can systematic effects be measured that confound the measurements of backscattering and depolarization made by 2 polarization systems. Paragraph 2 of Section 7 has been modified to clarify these points.
- The author contributions statement on Pg. 19, Line 20 reads: "R. Stillwell prepared the manuscript with contributions from all co-authors." The brevity and lack of detail in this statement is completely unacceptable. Based on the acknowledgement of an NSF GRFP

Fellowship, presumably the first author is a student so I would expect to see someone with the contribution of advising and supervising the research. Similarly, who took the data? Who maintained the instrument? Who analyzed the data? Why is this a 5-author paper?

- The authors agree with the reviewer. The authors have included a more extensive list of author contributions.
- In Figure 2, the y-axis is incorrectly labeled depolarization instead of depolarization ratio.
  - The figure y-axis label has been updated as suggested.
- It's hard for me to interpret Figure 7 other than to note that PC seems to be seeing liquid clouds less often than the Analog, and SCPC is similar or in between. Which is correct?
  - There are different effects that can impact each of the 6 measurements differently. Figure 7 illustrates this by presenting all 6 measurements used to classify the cloud type or clear air from the same scattering volume. A merged best estimate data product is determined by optimizing all of the available information from these six measurements. As described in earlier sections for example, analog detection systematically underestimates cloud fraction (too much clear air) and photon counting systematically underestimates liquid cloud types. With proper evaluation and multiple polarization channels, each cloud type and observing condition can be evaluated, biases quantified, and cloud products optimized for application to scientific investigation – as presented in Part 2.
- Appendix A and Figure 8 are not meaningful. I suggest that this section be removed or moved to the Supplementary Material.
  - Appendix A is simply used to support the assertion that CAPABL is a non-paralyzable system with its deadtime and deadtime error bound and as a collection of relevant information for saturation analysis of lidar systems. The authors feel it is a needed repository of information. The authors want the presented data as transparent as possible so that others looking to implement such a scheme can be complete and, as such, have a preference for leaving the information as an appendix, but would be OK with its inclusion as a supplement if insisted.

# ~~Low-Level, Liquid-Only and Mixed-Phase Cloud Identification by Polarimetric Lidar~~ Identifying and Characterizing the Properties of Arctic Clouds Using Enhanced Polarimetric Lidar. Part 1: Observations and Classification

Robert A. Stillwell<sup>1</sup>, Ryan R. Neely III<sup>2,3</sup>, Jeffrey P. Thayer<sup>1</sup>, Matthew D. Shupe<sup>4,5</sup>, and Michael O'Neill<sup>4</sup>

<sup>1</sup>Aerospace Engineering Sciences, University of Colorado at Boulder, ECNT 320, 431 UCB, University of Colorado, Boulder, CO 80309.

<sup>2</sup>School of Earth and Environment, University of Leeds, LS2 9JT, Leeds, UK.

<sup>3</sup>National Centre for Atmospheric Science, University of Leeds, LS2 9JT, Leeds, UK.

<sup>4</sup>Cooperative Institute for Research in Environmental Sciences, University of Colorado at Boulder, 216 UCB, University of Colorado, Boulder, CO 80309.

<sup>5</sup>Earth System Research Laboratory, National Oceanic and Atmospheric Administration, 325 Broadway, Boulder, CO 80309.

*Correspondence to:* Robert Stillwell (robert.stillwell@colorado.edu)

**Abstract.** The measurement of low-level, liquid-only and mixed-phase clouds in the polar regions is a necessary building block to understand the regional surface energy and mass budgets over ice sheets. The unambiguous retrieval of cloud phase from polarimetric lidar observations is dependent on the assumption that only cloud scattering processes alter the transmitted polarization. However, due to clouds varying in range, optical depth, and scatterer size and shape, most atmospheric lidar systems ~~must observe high dynamic ranges in scattered signal strengths. Depending on the polarization component measured, these signals can far exceed the linear range of a detection system. Thus, due to~~ experience high signal dynamic ranges, which can impact the lidar system response and make the cloud phase determination ambiguous. Due to the high optical thickness and predominately low-lying nature of liquid-only and mixed-phase clouds in the polar regions, relative to ice-only clouds, a systematic ~~overestimate bias~~ of the traditional lidar depolarization ratio, which uses co-polarized and cross-polarized signals, can occur ~~due to the large dynamic range signals that is not always identifiable in traditional polarimetric lidar systems.~~ For both liquid-only and mixed-phase clouds, this results in a misidentification of liquid water in clouds as ice, which has broad implications on evaluating surface energy budgets. The Clouds Aerosol Polarization and Backscatter Lidar (CAPABL) at Summit, Greenland employs multiple planes of linear polarization, and photon counting and analog detection schemes, to self evaluate, correct, and optimize signal combinations to improve cloud classification. Using novel measurements of diattenuation that are sensitive to both preferentially oriented ice crystals and counting system non-linear effects, unambiguous depolarization ratio measurements are possible by over constraining polarization measurements. This overdetermined capability for cloud phase determination allows for system errors to be identified and quantified in terms of their impact on cloud properties. Furthermore, the multiple signals permits optimal selection of signals to provide the best estimate of the cloud property. For example, ~~an examination of observations of liquid-only and mixed-phase clouds at Summit shows the difference in the estimate of the median height for liquid clouds is shown to differ by~~ as much as ~~a 2 kilometer offset in median cloud height of~~

~~those identified as liquid due to a systematic bias in photon counting signals~~km between analog and photon counting detection  
because of photon-counting detection misidentifying the presence of low-lying liquid clouds as ice. At a constant altitude, more  
than 94% of the liquid ~~pixels-voxels~~ identified with analog signals can be misidentified as ice ~~with~~when using photon counting  
signals. This results in a possible error of ~~fractional occurrence of cloud liquid~~the assessed radiative impact of liquid clouds of  
5 approximately 30% ~~-It is shown when using traditional polarimetric lidar~~. Observations from CAPABL show that by observing  
polarization planes that are non-orthogonal ~~, the dynamic range and adding measurements of diattenuation, saturation effects~~  
of observed signals is reduced, the coverage of the expected signal dynamic range is increased, and more linear response can  
be captured enabling unambiguous measurements of the lidar depolarization ratio from atmospheric scatterers. Using non-  
orthogonal polarization observations is shown to enhance measurement sensitivity, increasing the effective sampling range for  
10 CAPABL by as much as 18% or approximately 1.5 km in clear air.

## 1 Introduction

The polar regions ~~have recently come into focus as are~~ a critical building block to understand the climate system. Changing  
Arctic conditions lead to many changes in regional surface energy and mass budgets, which have a profound impact on humans  
outside the region (Curry et al., 1996; Hansen et al., 2011). Locked within the Greenland Ice Sheet (GrIS) is the the potential  
15 for sea level rise on the order of 7 *m* (Gregory et al., 2004), of which approximately 25 *mm* has already been contributed from  
1900 to present with an increased rate of mass loss in recent years (Kjeldsen et al., 2015). Several studies have linked variability  
of the surface energy and mass budgets to cloud properties and in particular low-level, liquid-only and mixed-phase<sup>1</sup> clouds  
(Bennartz et al., 2013; Sherwood et al., 2014; Miller et al., 2015; Tan et al., 2016). ~~note that modeling is the most practical~~  
~~method to understand widespread climate change, which is especially true in the polar regions where dense observations are~~  
20 ~~inhibited by the remote and extreme conditions found there. While the climate is sensitive to~~The climate is sensitive to both  
cloud macro and microphysical properties, yet substantial gaps are present in understanding of fundamental cloud processes  
due to a limited set of cloud observations to which model results may be compared (Curry et al., 1996; Cesana et al., 2012;  
Morrison et al., 2012; Bennartz et al., 2013; Van Tricht et al., 2016).

Understanding the nature of liquid-only and mixed-phase clouds is important for understanding the polar surface energy  
25 budget. Mixed-phase clouds show remarkable persistence in the Arctic even though the liquid phase is colloiddally unstable,  
possibly persisting for days to weeks given the correct synoptic conditions (Shupe et al., 2006). Furthermore, though liquid-  
only and mixed-phase clouds can be found up to heights of approximately 6 km ~~AMSL above mean sea level (amsl)~~ in the polar  
regions, they have been found by many to be predominately low-lying with high optical thickness (note that in this manuscript,  
high is taken relative to ice-only clouds existing in the same region and not to liquid clouds existing in the mid-latitude or  
30 tropical regions) (Curry et al., 1996; Intrieri et al., 2002; Turner, 2005; Shupe et al., 2006; de Boer et al., 2009; Shupe, 2011;

---

<sup>1</sup>This work uses the definition of mixed-phase presented by Shupe et al. (2008) where a mixed phase cloud is defined as a cloud system containing both  
liquid and ice water that interact via microphysical processes. The complete system must contain both liquid and ice water but no requirement is made on the  
exact location or quantity of either phase.

Shupe et al., 2013). Such characteristics make these clouds particularly hard to measure accurately from both the ground and space. Shupe et al. (2006) further notes that mixed-phase clouds are an understudied component of global cloudiness resulting in their poor representation in models at all scales, a finding supported by others including Cesana et al. (2012); Pithan et al. (2014); Kay et al. (2016). The focus of ~~this paper~~ Part 1 of this two-part work is the interpretation of ground based polarimetric  
5 lidar measurements of Arctic liquid-only and mixed-phase clouds and ~~addressing-assessing~~ systematic biases that ~~improve~~ inhibit their proper identification.

Polarimetric lidar data is particularly useful for cloud and aerosol studies to determine properties such as cloud phase, cloud base height, particle orientation, extinction, and for broad aerosol classifications (Schotland et al., 1971; Measures, 1984; Sassen, 1991; Kaul et al., 2004; Fujii and Fukuchi, 2005; Weitkamp, 2005; Freudenthaler et al., 2009; Hayman and  
10 Thayer, 2012; Groß et al., 2015). ~~Its utility~~ The utility of lidar observations can be enhanced by using complementary measurements that grant a more complete perspective such as cloud radars, microwave radiometers, and radiosondes as done for programs like the Surface Heat Budget of the Arctic Ocean (SHEBA) (Shupe et al., 2006), the Department of Energy  
Atmospheric Radiation Measurement program's atmospheric observatories (Verlinde et al., 2016), and Mixed Phase Arctic Clouds Experiment (MPACE) (Verlinde et al., 2013). Despite its utility, polarimetric lidar has limitations, among them is the  
15 stringent requirement of linear signal operation over a large dynamic range. If not properly designed or considered, measurements can be misinterpreted casting doubt on critical measurements like cloud phase ~~-(~~Hayman and Thayer, 2009; Liu et al., 2009; Neely et al., 2013). For example, traditional two-channel orthogonal polarization measurements using co-polarized and cross-polarized signals can not unambiguously separate systematic polarization effects and geophysical effects. These measurement errors ~~in-turn-result in cloud misidentification, which, in turn,~~ introduce unquantified error into model results which  
20 are used to study key cloud and radiative processes. Observations by lidar of polar liquid-only and mixed-phase clouds in particular are challenging due to their high optical thicknesses, relative to ice-only clouds, and low-lying altitude, which demands large system dynamic ranges.

This work focuses on novel polarimetric lidar measurements made at Summit, Greenland (~~72°35'46.4" N, 38°25'19.1" W, 3212 m asl~~)  
(72°35'46.4" N, 38°25'19.1" W, 3.212 km amsl) as part of the Integrated Characterization of Energy Clouds Atmospheric  
25 State and Precipitation at Summit (ICECAPS) program outlined by Shupe et al. (2013). The measurements to be presented are taken from the Clouds Aerosol Polarization and Backscatter Lidar (CAPABL), which was originally designed to measure polarization properties of clouds with emphasis on identifying preferentially oriented ice crystals and cloud phase (Neely et al., 2013). Analysis of five years of data observed by CAPABL has highlighted several uncertainties and biases that can cause errors in the interpretation of geophysical retrievals of cloud phase, primarily caused by the system limitations to adequately  
30 handle the observable dynamic range in backscattered signals from clouds. ~~The goal of this paper is~~ This paper serves as Part 1 in a two-part series to definitively describe these errors ~~,-using CAPABL as an example, with emphasis on improving the geophysical interpretation of lidar measurements by employing CAPABL's advanced polarization capabilities. Furthermore, this Part 1 paper demonstrates how CAPABL can be used to improve cloud property retrievals important for scientific study. The Part 2 paper exploits these advancements to optimize cloud property estimates and, with complementary multi-sensor observations at Summit, determine the effects of the cloud properties on the surface radiation budget.~~  
35 observations at Summit, determine the effects of the cloud properties on the surface radiation budget.

The outline of this paper is as follows. The ~~polarization-measurement~~ theory used, upon which the retrievals within CAPABL's automatic processing are based, is stated in Sect. 2. An overview of the CAPABL system is provided in Sect. 3 with an emphasis on the ~~significant~~ updates that have been made to the instrument since its introduction by Neely et al. (2013). An overview of the data processing is provided in Sect. 4 with emphasis on geophysical retrievals and potential errors caused by ~~limited~~-signal dynamic range. Relevant cloud statistics for a 4 month period are compiled in Sect. 5. A comparison of results focusing on the errors of geophysical cloud property estimates resulting from data misinterpretation is given in Sect. 6. Finally this paper concludes in Sect. 7 with a summary and recommendations for general cloud observations via lidar and suggestions for additional work to further improve polarimetric lidar retrievals of polar liquid-only and mixed-phase clouds.

## 2 ~~Polarization-theory~~Measurement Theory

### 2.1 CAPABL's Polarization Retrievals and Mueller Formalism

Polarimetric lidar leverages the vector nature of light to more completely describe scattering. Using a vector description of light allows one to describe scatterers by how they alter polarization states of light as well as how much energy is redirected. Hayman and Thayer (2012) use polar decomposition of Mueller matrices to define the Stokes vector lidar equation (SVLE), which links transmitted and received polarization states of light to physical attributes of the scatterers. This equation forms the basis of CAPABL's polarization retrievals and is given in Eq. 1

$$\bar{N}(R) = \bar{O}\bar{M}_{R_x}(\bar{k}_s) \left[ \left( G(R) \frac{A}{R^2} \Delta R \right) \bar{T}_{atm}(\bar{k}_s, R) \bar{F}(\bar{k}_i, \bar{k}_s, R) \bar{T}_{atm}(\bar{k}_i, R) \bar{M}_{T_x}(\bar{k}_i) \bar{S}_{T_x} + \bar{S}_B(\lambda_{R_x}) \right] \quad (1)$$

where  $\bar{N}$  is vector of photon counts for each polarization channel as a function of range,  $R$ ,  $\bar{O}$  is the observation matrix describing each polarization observation channel,  $\bar{M}_{T_x}$  and  $\bar{M}_{R_x}$  are the Mueller matrices describing the transmitter and receiver, which are functions of the incident and scattered wave vector  $\bar{k}_i$  and  $\bar{k}_s$ , respectively,  $G$  is the physical overlap function of the transmitter and receiver,  $A$  is the telescope area,  $\Delta R$  is the range resolution of the counting system,  $\bar{T}_{atm}$  is the one way transmission Mueller matrix either between the transmitter and the scatterer or between the scatterer and the receiver,  $\bar{F}$  is the scattering phase matrix, which is a function of both transmitted and received wave vectors and range,  $\bar{S}_{T_x}$  is the Stokes vector of the light from the laser source, and  $\bar{S}_B$  is the Stokes vector of the background condition which is a function of the receiver wavelength window,  $\lambda_{R_x}$ . The terms of the equation are organized by their functional order because matrix operations do not generally commute. The observation matrix is also included because only intensity can be measured directly with the full Stokes vector determined through measurement with particular configurations of the analyzer (Hayman and Thayer, 2012). Finally, the standard assumptions used to derive the lidar equation including independent and single scattering are also used here, though they are not strictly required. For more information on the SVLE and its derivation, the reader is referred to Hayman and Thayer (2012).

Elements of  $\bar{F}$  can be used to describe physical attributes of scatterers beyond simple scattering cross section (Kaul et al., 2004). The reader is referred to Neely et al. (2013) who describe the polarization retrievals and the physical interpretation

of the elements CAPABL measures in detail. ~~This description is extended~~ The retrieval presented by Neely et al. (2013) is generalized here by relaxing the assumptions made in that work, namely that the receiver orientations are fixed at  $0^\circ$ ,  $45^\circ$ , and  $90^\circ$  relative to the output linear polarization.

From this general form ~~given in~~ Eq. 1, the number of photons to be observed can be derived in each polarization channel,  
 5 given in Eq. 2 ~~as~~

$$N_M(R) = \xi(R) [F_{11}(R) + \cos(2\theta) F_{12}(R) + \cos(2\phi) (F_{12}(R) + \cos(2\theta) F_{22}(R)) + \sin(2\theta) \sin(2\phi) F_{33}(R)] \quad (2)$$

assuming that CAPABL: 1) emits a linear ~~polarization-polarized signal~~ at angle  $\phi$  ~~from the tilt axis~~ (yielding the simplification  $\bar{M}_{T_x}(\bar{k}_i) \bar{S}_{T_x} = \begin{bmatrix} 1 & \cos(2\phi) & \sin(2\phi) & 0 \end{bmatrix}^T$ ), and 2) only measures linear ~~polarizations-polarized signal~~ at angle  $\theta$  from the reference transmit polarization, (Neely et al. (2013) Eq. 15 with  $A(\Gamma_{wp}) = \bar{M}_{R_x}(2\theta)$ ). These assumptions have been  
 10 questioned for some optical systems, e.g. (Di et al., 2016), but have been directly measured for CAPABL with a transmitter polarization purity of 123:1 and a receiver polarization purity of  $> 800:1$ , resulting in ~~an error of a system bias in~~ the depolarization ratio no greater than 0.8%. This work uses the definition of the backscattering phase matrix as given by Neely et al. (2013) in their Eq. 5. Note that all constant terms of Eq. 1, which will cancel when taking signal ratios, are lumped into the term  $\xi(R)$  such as the measurement solid angle, geometric overlap, range resolution, and atmospheric transmission. The  
 15 transmission Mueller matrix is thus the identity matrix.

Here the number of measured photons incident upon the photodetector,  $N_M(R)$ , is a function of transmitted and received polarization angle  $\phi$  and  $\theta$ , respectively, and is related to the scattering phase matrix terms,  $F_{11}(R)$ ,  $F_{12}(R)$ ,  $F_{22}(R)$ , and  $F_{33}(R)$  which are all functions of range. For CAPABL,  $\phi = 45^\circ$ ; applying this constraint to Eq. 2 cancels the functional dependency on  $F_{22}(R)$  by design. Thus, using three distinct receiver polarization channels:  $\theta_1$ ,  $\theta_2$ , and  $\theta_3$ , one can create a  
 20 set of three simultaneous equations which can be inverted to calculate the Mueller matrix terms of interest which describe backscattering efficiency, depolarization, and diattenuation (used to determine preferential orientation of scatterers). This set of equations is given in Eq. 3 ~~as~~

$$\begin{bmatrix} N_1(R) \\ N_2(R) \\ N_3(R) \end{bmatrix} = \xi(R) \begin{bmatrix} 1 & \cos(2\theta_1) & \sin(2\theta_1) \\ 1 & \cos(2\theta_2) & \sin(2\theta_2) \\ 1 & \cos(2\theta_3) & \sin(2\theta_3) \end{bmatrix} \begin{bmatrix} F_{11}(R) \\ F_{12}(R) \\ F_{33}(R) \end{bmatrix} \rightarrow \bar{N} = \bar{A} \bar{F}. \quad (3)$$

The general matrix inverse of  $\bar{A}$  is given in Eq. 4, ~~which is not a function of range but only receive polarizations. The term  $\zeta$  is introduced in Eq. 5 as a constraint on the validity of the inversion where  $\zeta = 0$  results in a degenerate inversion because of receiver polarization selection.~~ as

$$\bar{A}^{-1} = \frac{1}{\zeta} \begin{bmatrix} \sin(2\theta_2 - 2\theta_3) & \sin(2\theta_3 - 2\theta_1) & \sin(2\theta_1 - 2\theta_2) \\ \sin(2\theta_3) - \sin(2\theta_2) & \sin(2\theta_1) - \sin(2\theta_3) & \sin(2\theta_2) - \sin(2\theta_1) \\ \cos(2\theta_2) - \cos(2\theta_3) & \cos(2\theta_3) - \cos(2\theta_1) & \cos(2\theta_1) - \cos(2\theta_2) \end{bmatrix}. \quad (4)$$



Note that the matrix  $\bar{A}$  and the matrix inverse  $\bar{A}^{-1}$  are not functions of range but only of the selected receiver polarizations. The term

$$\zeta = \cos(2\theta_3)(\sin(2\theta_2) - \sin(2\theta_1)) + \cos(2\theta_1)(\sin(2\theta_3) - \sin(2\theta_2)) + \cos(2\theta_2)(\sin(2\theta_1) - \sin(2\theta_3)) \quad (5)$$

is introduced in Eq. 4 as a constraint on the validity of the inversion where  $\zeta = 0$  results in a degenerate inversion because of receiver polarization selection.

A general form of depolarization ~~and diattenuation~~

$$d - 1 = \frac{F_{33}}{F_{11}} = \frac{(\cos(2\theta_3) - \cos(2\theta_2))N_1 + (\cos(2\theta_1) - \cos(2\theta_3))N_2 + (\cos(2\theta_2) - \cos(2\theta_1))N_3}{\sin(2\theta_2 - 2\theta_3)N_1 + \sin(2\theta_3 - 2\theta_1)N_2 + \sin(2\theta_1 - 2\theta_2)N_3} \quad (6)$$

and diattenuation

$$D = \frac{F_{12}}{F_{11}} = \frac{(\sin(2\theta_3) - \sin(2\theta_2))N_1 + (\sin(2\theta_1) - \sin(2\theta_3))N_2 + (\sin(2\theta_2) - \sin(2\theta_1))N_3}{\sin(2\theta_2 - 2\theta_3)N_1 + \sin(2\theta_3 - 2\theta_1)N_2 + \sin(2\theta_1 - 2\theta_2)N_3} \quad (7)$$

- 10 for CAPABL can be expressed in terms of arbitrary observation angles ~~as given in Eq. 6 and Eq. 7, respectively~~, assuming the condition  $\zeta \neq 0$  (for CAPABL  $\zeta \approx -2$  calculated from receiver polarizations via atmospheric calibration performed for each measurement). Note that the range dependency of depolarization ( $d$ ), diattenuation ( $D$ ),  $F_{\#\#}$ , and  $N_{\#}$  are dropped to simplify the expressions.

- The expressions given in Eq. 6 and Eq. 7 are generalizations of the equations presented by Neely et al. (2013) that assume fixed receiver polarization angles. The diattenuation equations presented by Neely et al. (2013) in their Eq. 7 and Eq. 20 can be recovered from our Eq. 7 by using  $\theta_1 = 45^\circ$ ,  $\theta_2 = -45^\circ$ , and  $\theta_3 = 0^\circ$  for their Eq. 7 and  $\theta_1 = 45^\circ$ ,  $\theta_2 = -45^\circ$ , and  $\theta_3 = \pm 90^\circ$  for their Eq. 20. The depolarization term presented by Neely et al. (2013) in their Eq. 8 can be recovered with either set of angles from our Eq. 6. For clarity, retrievals performed with equations from Neely et al. (2013) are referred to as traditional or orthogonal as the polarizations used are orthogonal in Poincare space. The retrievals using Eq. 6 and 7 are referred to as non-orthogonal as they require no such assumption.

- Equations 6 and 7 are valid for randomly or preferentially oriented axially symmetric scatterers. If random orientation is observed, diattenuation will be strictly  $D = 0$  and the scattering Mueller matrix simplified to a function of two elements, depolarization  $d$  and the volume backscatter coefficient  $\beta$ . This form of the backscattering phase matrix has been given by Mishchenko and Hovenier (1995); Flynn et al. (2007); Gimmestad (2008); Hayman and Thayer (2009, 2012) and is completely consistent with their definitions of depolarization.

## 2.2 Dynamic Range

- Polarimetric lidar places stringent requirements on optical detection ~~systems due to the large dynamic range of observed signals. It is important to note that the system to detect intensity changes between polarization states over a large range of signal strengths, also known as signal dynamic range~~. The total dynamic range of observed signals arises from many terms in the SVLE. This work will parse two, which will be referred to as range-induced dynamic range and ~~detector-induced polarization-induced~~ dynamic range. Range-induced dynamic range arises from the solid angle term,  $A/R^2$ , and causes signal

strength to vary significantly over the altitude range of interest, especially for tropospheric lidar systems. From the initial signal overlap range ~~of 50 m to the to 5 km~~, this term changes by ~~4~~ four orders of magnitude. This is ~~2~~ two orders of magnitude greater than ~~the a~~ change from 10 km to 100 km.

~~Detector-induced Polarization-induced~~ dynamic range arises from having different ~~signal intensities at the same altitude~~ ~~caused by polarization selection~~, scattered signal intensities from the same scattering volume and detected by different receiver polarization states. Polarization-induced dynamic range is mathematically defined by Eq. 2 by picking different values of  $\theta$ . An example of this is the frequently used ~~depolarization ratio which is lidar~~ depolarization ratio, which is the ratio of signals measured in cross-polarized and co-polarized channels, referred to throughout this work as perpendicular and parallel, respectively, defined further in Sect. 2.3. ~~If one were to consider the differences in signal strength of a depolarization ratio of~~ ~~1 vs 100, there is substantial variations as well.~~ A depolarization ratio measurement of 1% indicates parallel and perpendicular polarization signals ~~vary from the same volume differ~~ by 2 orders of magnitude whereas a measurement of 100% indicates the signals are ~~the same equal in~~ magnitude.

Combining ~~range induced and detector induced dynamic range, to measure the depolarization ratio range induced and polarization induced dynamic range to measure a depolarization ratio value~~ of 1% from 50 m to 5 km ~~spans~~ 6 orders of magnitude ~~would be required of signal. This includes observations~~ from the weakest high-altitude perpendicular signal to the strongest low-altitude parallel signal. Figure 1 ~~illustrates these frames the~~ dynamic range terms for a general set of polarization signals. These data are taken during a relatively clear ~~air sky~~ period at Summit. ~~This figure Figure 1~~ shows raw signals observed from CAPABL using arbitrary units to highlight the dynamic range caused by the measurement of depolarization and by the solid angle term of Eq. 1. In this case, ~~detector induced polarization induced~~ dynamic range introduces approximately 1.5 orders of magnitude ~~and range of signal within the scattering volume, hereafter referred to as a voxel, and~~ approximately 4.5 orders of magnitude ~~of signal due to range coverage~~. Adding these together, to measure clear air ~~backscatter intensities~~ from 50 m to 10 km would require ~~no less an observing system with no fewer~~ than 6 orders of magnitude ~~of signal capacity~~. Note that clear air and liquid bearing clouds both have high polarization-induced dynamic range, i.e. low depolarization ratio, but liquid bearing clouds have more rapid attenuation of signal, which is not range-induced dynamic range but rather signals ~~reduced by attenuation captured in the transmission terms of the SVLE.~~

Presented in Fig. 1 are observations from CAPABL using two different observational methods: photon counting and analog detection. Photon counting systems are capable of measuring weak light signals, while analog systems sacrifice sensitivity to measure stronger signals. In photon counting, detector signals are discriminated with a fixed voltage threshold whereas all voltages are summed for analog detection. More detail on the functional differences of photon counting and analog detection ~~is provided in Sect. 3.~~

As a result of this large ~~dynamic~~ range in signals, the requirement that ~~the receiver each receiver modality~~ is acting linearly, i.e. that there is a linear correspondence between incident intensity observed at the receiver photodetector ~~for each polarization state~~ (the information provided by the SVLE) and the number of photons counted, or voltage measured, is critically important. This assumption is known to be limiting ~~for photon counting detection~~ due to the possibility of multiple photons arriving at the detector at the same time (Whiteman et al., 1992; Donovan et al., 1993; Liu et al., 2009; Newsom et al., 2009). Pulse pileup,

referred to throughout this work as saturation, results in the under-representation of signal intensities ~~in some portions by photon counting detection in some polarization states~~ of the observed lidar profile while ~~leaving other portions other polarization states~~ are unaffected. Critically, saturation can affect different polarization channels in an uneven manner and, therefore, directly cause biases in geophysical retrievals when using signal intensity. In Fig. 1, this is seen clearly as saturation affects the photon counting parallel signal below 6 km ~~but and~~ the photon counting perpendicular signal ~~only~~ below 2 km.

### 2.3 Depolarization Ratio and Saturation

To fully demonstrate retrieval errors caused by saturation, the traditional ~~linear lidar~~ depolarization ratio,  $\delta$ , ~~defined as:~~

$$\delta(R) = \frac{S_{0\perp}(R)}{S_{0\parallel}(R)} = \frac{d(R)}{2 - d(R)} \quad (8)$$

is considered, ~~given in Eq. 8 in in~~ its standard form as well as its relation to depolarization  $d$  (Schotland et al., 1971; Intrieri et al., 2002; Flynn et al., 2007; Shupe, 2007; Gimmestad, 2008; de Boer et al., 2009; Hayman and Thayer, 2009, 2011). It should be noted that depolarization  $d$  is a Mueller matrix element only (Gimmestad, 2008) resulting from the polar decomposition procedure of Lu and Chipman (1996); Hayman and Thayer (2012); depolarization ratio,  $\delta$ , has been often related to hydrometeor phase but is not an element of the Mueller formalism directly. ~~Errors in depolarization ratio linked to multiple scattering are well documented~~ (Eloranta, 1998). ~~As Mie scattering only predicts zero depolarization for the backscattering direction~~ (Van De Hulst, 1957; Bohren and Huffman, 1998; Bohren and Clothiaux, 2005), ~~photons that have been multiple scattered by spherical targets can display non-zero depolarization. This work adds analysis of depolarization errors due primarily to saturation.~~

In Eq. 8,  $\delta(R)$  is the ~~lidar~~ depolarization ratio as a function of range,  $S_{0\perp}$  is the photon arrival rate at the detector surface in the perpendicular channel as a function of range, and  $S_{0\parallel}$  is the photon arrival rate at the detector surface in the parallel channel as a function of range. ~~These  $S_{0\perp}$  and  $S_{0\parallel}$  are the theoretical arrival rates and not the observed arrival rates. If careful attention is not paid to signal saturation, then the stronger parallel signals may be underestimated causing the depolarization or equivalently the depolarization ratio to be overestimated which can be easily mistaken for geophysical signatures. If, for example, a non-paralyzable system is assumed, corrected for CAPABL's photon counting system based on the analysis provided in Appendix A saturation model is assumed that links theoretical and observed photon count arrival rates,~~ Eq. 8 can be recast as given ~~in Eq. 9 to link the theoretical arrival rates to observed depolarization ratio.~~

as

$$\delta_O(R) = \frac{\frac{S_{0\perp}(R)}{1 + \tau S_{0\perp}(R)}}{\frac{S_{0\parallel}(R)}{1 + \tau S_{0\parallel}(R)}} = \delta(R) \frac{1 + \tau S_{0\parallel}(R)}{1 + \tau S_{0\perp}(R)} \quad (9)$$

to link the theoretical depolarization ratio to the observed depolarization ratio. Note that the non-paralyzable model assumes that it takes some finite time for the photon counting system to reset before it can count another photon and is correct for CAPABL's photon counting system based on the analysis and further description provided in Appendix A.

Here  $\delta_O(R)$  is the observed depolarization ratio and  $\tau$  is the photon counting system dead time described by Donovan et al. (1993). CAPABL's photon counting acquisition is best modeled as a non-paralyzable system with a dead time of approximately 6 ns, therefore, depolarization ratio values observed from parallel channel count rates exceeding 1 to 10 MHz are noticeably biased high. Qualitatively, this effect can be seen in Fig. 1 where the signal induced dynamic range is virtually constant for analog detection but a strong function of height for photon counting detection.

Depolarization ratio error is shown quantitatively in Fig. 2 for many possible ways of measuring depolarization. A similar procedure is performed as in Fig. 1 where photon count rates are modeled from the SVLE and then used in the retrievals given by Eq. 9, but starting with Eq. 6, and applying a combination of receiver polarization angles into the depolarization ratio calculation. This is done for 6 sets of polarization angles, roughly equivalent to those measured by CAPABL, to demonstrate the biases inherent in the possible depolarization measurements. The traditional way of measuring depolarization requires parallel and perpendicular signals which maximizes the ~~detector-induced~~ polarization-induced dynamic range, given in panel (a) of Fig. 2. Panels (b) through (f) show possible alternatives that either show less sensitivity to saturation or more uniform sensitivity to saturation using receiver polarizations other than the standard parallel and perpendicular. Using the threshold of  ~~$\delta = 0.11$~~   $\delta_Q = 0.11$  defined by Intrieri et al. (2002); Shupe (2007), these biases can, at high count rates, exceed the limit set between liquid and ice making it impossible to observe liquid water even if the true depolarization ratio is smaller than the set threshold, i.e.  $\delta_O(R) > 0.11$  when  $\delta(R) \leq 0.11$ . ~~It should be observed that the~~ The effect of saturation shown in panel (a) is neither uniform with count rate or true depolarization ratio nor is it negligibly small relative to the limit set between liquid and ice. The alternatives in panels (b) through (f) offer more uniformity and ~~or~~ reduced bias.

In the polar regions, given that most liquid clouds are relatively low-lying, optically thick, and occur in all seasons, saturation will affect signal levels frequently for photon counting detection (Intrieri et al., 2002; Turner, 2005; Shupe et al., 2006; de Boer et al., 2009; Shupe et al., 2011; Shupe, 2011; Shupe et al., 2013; Cesana et al., 2012). ~~This is true regardless of the counting method employed (note the methods are described in more detail in Sect. 3). For photon counting saturation will become prominent and for analog detection pulse heights can exceed analog to digital converter bounds (clipping).~~ This saturation will directly bias depolarization values, which will ultimately cause the misrepresentation of liquid clouds as ice clouds ~~and clipping will result in areas that are unobservable~~. The results of this paper quantify the extent of the saturation impact for CAPABL for a 4 month period from July 2015 to October ~~2015~~. 2015 and demonstrates the improvements in cloud characterization when using multiple polarization planes.

## 2.4 Diattenuation

As discussed, observed depolarization ratios are a function of atmospheric scattering, optical system setup, and recording systems. Traditional two-channel polarization systems can not unambiguously measure atmospheric depolarization without additional information. However, separating atmospheric depolarization from systematic effects is non-trivial. Hayman and Thayer (2009) show, for example, how to remove depolarization ratio effects caused by receiver optical retardance and scattering. However, recording systems that are subject to saturation can also cause depolarization ratio effects, which are not constant in range and can not be calibrated using methods like that presented in Hayman and Thayer (2009).

The CAPABL system requires at least 3 polarization measurements to measure the  $F_{11}(R)$ ,  $F_{12}(R)$ , and  $F_{33}(R)$ . However, saturation has been observed to cause biases in CAPABL measurements using only 3 polarizations. Thus, a forth polarization channel is added, three to measure atmospheric properties and one to monitor recording system effects. Specifically, the  $F_{12}(R)$  term is measured twice using two sets of polarization channels with opposite sensitivity to saturation. If the  $F_{12}(R)$  terms measured in two different ways are consistent at a given altitude, the lidar counting system is operating normally. An advantage of this over-constrained polarization retrieval is that CAPABL can actively monitor if the polarization measurements are acting properly or are causing systematic biases. A combination of any 3 of the 4 polarization channels can be used to optimize CAPABL's retrievals if the polarization signals are not subject to saturation. If  $F_{12}(R)$  is zero, i.e no preferentially oriented ice is present, only 2 of the 4 channels are needed. However, if the polarization retrievals are acting improperly, subject to saturation, CAPABL can identify measurements with non-physical retrieved values and separate them from geophysical values.

### 3 The Clouds Aerosols Polarization and Backscatter Lidar

The CAPABL system has been deployed to Summit, Greenland within the ICECAPS sensor suite since 2010 (Shupe et al., 2013; Neely et al., 2013). The basic operation and measurement principle is well described by Neely et al. (2013) based on the polarization theory developed by Hayman and Thayer (2012). ~~While the basic measurement principle and resulting raw data products have remained constant since installation,~~ However, since its installation several hardware modifications, completed in June 2015, have improved the system's overall observational capacity. These ~~hardware modifications were completed in June 2015. These modifications~~ modifications are briefly described with an emphasis on how they allow the CAPABL system to better observe clouds via enhancement of counting system dynamic range.

After several years of data collection, the original Nd:YLF laser described by Neely et al. (2013) was replaced by a more powerful Nd:YAG laser. This changed the laser wavelength from 523 nm to 532 nm. The optical components were accordingly changed. In addition, the telescope was replaced by a smaller Schmidt Cassegrain telescope to allow the system to be more easily tilted; the current tilt angle is 32° from vertical. The photo multiplier tube (PMT) was upgraded from the original PMT, a Thorn EMI 9863B/100, to a Hamamatsu R7400U-03. The current system specifications are given in Table 1, which can be compared to Table 1 from Neely et al. (2013) for reference.

The major change was an upgrade of the receiver counting system from a purely photon counting system to a combined analog and photon counting system. Photon counting systems are capable of measuring weak light signals, ~~while analog which allow them to observe high altitudes effectively (relative to analog detection).~~ Analog systems sacrifice sensitivity to measure stronger signals, which facilitates measurement of low altitudes. In photon counting, detector signals are discriminated with a fixed voltage threshold. This threshold is set to remove much of the electrical noise resulting from using single-photon, high-gain PMTs. When a voltage signal is observed in excess of the threshold, a photo-electron is counted and its time of flight is assigned to a particular time bin. The intensity is presumed to be linearly related to the total number of counts in that bin over some integration period. Error can arise with this technique, however, if photons arrive at the counting system in close

succession. It is possible that pulses can pileup in such a way that two or more pulses either overlap in time or pass through the system faster than the counting system can reset itself. In either case, the intensity observed by the optical system is not linearly proportional to the number of photo-electrons counted because some photo-electrons have not been counted. In analog detection, the discrimination threshold is removed and the voltage produced by the detector is passed through an analog-to-digital converter with its amplitude providing the relative intensity of the collected backscattered signal. This method requires much higher signal-to-noise ratio than photon counting because of the lack of noise mitigating discriminators useful when signal-to-noise levels approach 1 (Donovan et al., 1993). By using a counting system that combines photon counting and analog detection, saturation is mitigated for high count rates using analog detection, approximately  $> 10\text{ MHz}$ , while maintaining sensitivity to low count rates, approximately  $< 1\text{ MHz}$ , using photon counting detection. More about this counting system can be found in Newsom et al. (2009).

## 4 Data Analysis and Cloud Phase Identification

Lidar observations are often used to classify clouds using direct backscattered intensity estimates and depolarization signatures (Schotland et al., 1971; Thomas et al., 1990; Sassen, 1991; Goldsmith et al., 1998; Shupe et al., 2008; Winker et al., 2009; Yoshida et al., 2010). The backscattered intensity can be related to the volume backscatter coefficient of the scatters and relates to the scatterers' number density and differential backscatter cross section. The depolarization ratio identifies the aspherical nature of the scatterers enabling ice to be distinguished from liquid. Specifically, liquid clouds have been identified by many studies with low depolarization ratios,  $\delta(z) < \sim 0.3$  to  $\sim 0.11$   $\delta_Q(z) < \sim 0.03$  to  $0.11$ , with ice being the complement (Intrieri et al., 2002; Shupe, 2007; de Boer et al., 2009). However, given that the observed depolarization ratio can be biased high based on system count rate using photon counting methods (shown in Fig. 2), low-level liquid-only or mixed-phase clouds with count rates in excess of  $\sim 10\text{ [MHz]}$   $\sim 10\text{ MHz}$  can appear to contain more ice than they actually do. As polar liquid-only and mixed-phase clouds occur predominantly low in the atmosphere, as observed by Intrieri et al. (2002) at SHEBA, Shupe et al. (2011) at Eureka, and Shupe et al. (2013) at Summit, this indicates a potential bias misidentifying liquid clouds as ice clouds ~~which is not physical~~.

### 4.1 ~~Definition of Data Masks~~ Processing Methods

Data masks are calculated taking advantage of CAPABL's variety of polarization signal measurements. There are several levels of processing and filtering to ensure data quality. These are implemented in an automatic algorithm. This section will describe the filtering steps. The steps are given in Table 2 and described here in order.

CAPABL makes observations with 5 second resolution per polarization angle and scans through 4 polarization angles before returning to the original polarization, taking a total of 20 seconds before returning to the first polarization angle. These polarizations are all linear and were oriented parallel to the outgoing polarization,  $0^\circ$ , ~~(referred to as par)~~, perpendicular to the outgoing polarization,  $90^\circ$  ~~(referred to as perp)~~, approximately  $45^\circ$  between parallel and perpendicular polarization (referred to as 3rd channel), and approximately  $110^\circ$  from parallel (or  $20^\circ$  from perpendicular) polarization (referred to as 4th channel).

The outgoing polarization is  $45^\circ$  ~~rotated from the tilt axis~~. These scans are parsed by like polarizations and time integrated to 20 seconds per polarization and spatially integrated to the resolution of 30 meters. Saturation corrections are applied per the method described in Appendix A and by Whiteman (2003). It is important to note that the variance of saturation-corrected photon counting is not simply the variance from Poisson statistics, but when saturation correcting, the error introduced by an inexact model fit is also included which increases the variance; this is taken into account for all error analyses and is described in Appendix A. All data is then background subtracted and subject to an SNR filter. The filter bounds are as follows: photon counting data with less than one photon count per bin after background subtraction and analog voltages less than 1 mv per bin after background subtraction (SNR ratio of approximately -5 dB) are removed. This background subtracted and SNR filtered data is then passed ~~to~~ through a speckle filter which interrogated a 5 by 5 ~~pixel-voxel~~ region around all observations. Measurements, where more than 75% of the surrounding data ~~is-are~~ removed by the SNR filter, are also removed. This yields three sets of quality controlled data referred to as Analog (A), Photon Counting (PC), and Saturation Corrected Photon Counting (SCPC).

Polarization properties are then calculated for each A, PC, and SCPC dataset by using the procedure describe in Neely et al. (2013). One deviation from the analysis presented in Neely et al. (2013) used here is the removal of the feedback loop for the 3rd and 4th channels; instead an atmospheric calibration range is used in post processing, which performs the same function as the feedback loop on a measurement by measurement basis. The original feedback loop described by Neely et al. (2013) was designed to accommodate slight retardance changes in liquid crystal variable retarder (LCVR) as a function of ambient laboratory temperature. However, in rapidly changing atmospheric scenes, the original feedback loop, designed to eliminate slow systematic effects, was observed to become unstable based on fast atmospheric effects. Using post processing calibration removes the instability by calculating LCVR retardance for each measurement independently. This has been observed to be more stable than the original feedback loop especially in quickly changing cloud scenes and when clouds occupy the pre-determined calibration altitude. This stability has been especially noted when observing low-lying, liquid-only or mixed-phase clouds because of the rapidly changing scene and flexibility of altering the calibration altitude to avoid cloud scenes in post processing.

Depolarization, depolarization ratio, and diattenuation as well as their error estimates are calculated using the ~~standard~~ orthogonal polarization approach presented by Neely et al. (2013), and also using the non-orthogonal approach described above. The orthogonal approach uses all the same steps as the original presentation but with the following exception. Instead of assuming the observations are made at exactly 1) parallel,  $0^\circ$ , 2) perpendicular,  $90^\circ$ , and 3)  $45^\circ$ , the angle of the third channel is carried through the analysis as a variable and the retrieved angle from atmospheric calibration is used. For the depolarization retrieval in areas that lack oriented scatterers, the depolarization can be calculated with any set of measurements of the 6 presented in Figure 2, but for this analysis the strongest 2 signals (~~par-parallel~~ and 3rd channels) were used to demonstrate the range enhancement possible. Orientation is identified by non-zero diattenuation,  $D$ , for those ~~pixels-voxels~~ identified as ice. Diattenuation is calculated in two ways, 1) using ~~par-perp~~ parallel, perpendicular, and the 3rd channel referred to as  $D_1$  and 2) using ~~par-perp~~ parallel, perpendicular, and the 4th channel referred to as  $D_2$ . These channels are chosen because of their opposite sensitivity to saturation for the PC retrievals. By multiplying the two measurements together, negative values indicate



$D_1$  and  $D_2$  are tending in opposite directions indicating a saturation event. Conversely, positive values of  $D_1 D_2$  indicate the two measurements are tending together and that the non-zero diattenuation is physical, i.e., unaffected by saturation.

Data is removed outside of the allowable ranges:  $0 \leq d \leq 1$ ,  $0 \leq \sigma_d \leq 0.4$ ,  $-1 \leq D \leq 1$ , and  $0 \leq \sigma_D \leq 0.2$ , as these represent non-physical conditions. Note that the error analysis procedure for PC described by Neely et al. (2013) assumes Poisson statistics where the data is assumed shot noise limited. The same procedure for PC is carried through the analysis shown here. The analog signal is not governed by Poisson statistics however. The analog uses the variance of the background voltages for its error estimates. Additionally, as mentioned above, the variance for SCPC is modified to reflect the correction procedure and the variance introduced via inexact model fitting. Finally the backscattering ratio, the ratio of total scattering to molecular scattering, is calculated using temperature and pressure information collected from the ICECAPS twice daily radiosonde program, interpolating between launches, and using the inversion technique of Klett (1981) as described by Neely et al. (2013).

By design, CAPABL uses 4 polarization channels to measure 3 elements of the scattering Mueller matrix:  $F_{11}$ ,  $F_{12}$ , and  $F_{33}$  with one additional measurement to monitor saturation. If saturation is not an issue, any 3 of the 4 channels may be used for the inversion of polarization properties. The utility of the generalization of the polarization theory of Neely et al. (2013) for this work is that the 3 signals with the least error can be used at any time. For example, the 3 strongest signals for measurements of high ice clouds where backscattered signals are weaker or the 3 weakest measurements for low liquid clouds where the backscattered signal is stronger.

## 4.2 Automatic Algorithm Bounds

Using all of ~~this information~~ the polarization processing listed above, the masking of data is performed in the following manner. Clear air is found as any time and altitude bin, referred to here as a pixelvoxel, with a backscattering ratio less than 26. Sub-visible clouds and aerosols are any pixelvoxel with a backscattering ratio between 26 and 50. Clouds are tagged as pixelsvoxels with backscattering ratio greater than 50. Within cloud pixelsvoxels, the depolarization ratio threshold, originally defined by Intrieri et al. (2002) of  ~~$\delta \geq 0.11$~~   $\delta_Q \geq 0.11$  was used to define ice and  ~~$\delta < 0.11$~~   $\delta_Q < 0.11$  as water. As the most common aerosol at Summit is ice, any pixelsvoxels tagged as aerosol that displays a depolarization  ~~$\delta \geq 0.11$~~  ratio  $\delta_Q \geq 0.11$  is reset as ice. Finally, preferentially oriented ice crystals are identified by  $D_1 D_2 > 0.01$  with  $\sigma_{D_1}, \sigma_{D_2} \leq 0.05$ .

## 4.3 Automatic Algorithm Bounds

The thresholds set for the automated classification algorithm are important to the interpretation of the results of this work. Depolarization and diattenuation are both elements of Mueller matrices, which are defined to have absolute values less than or equal to unity. Values outside this are non-physical. The values on the depolarization and diattenuation error bounds are limited mostly by background count rate, which is tuned via receiver hardware. A receiver neutral density filter lowers both the signal count rates and atmospheric background count rate by a factor of 1000, which brings the signal ~~rates~~ intensity into the desired dynamic range of the counting system and makes the depolarization and diattenuation error values limited only by shot noise. The filters, which remove data points based on depolarization and diattenuation and their errors, remove less than 3% of all data values. For context, background and speckle filters remove approximately 60% and 23%, respectively, of all data points



(data is collected to 35 km). Further, the percent of values removed by the error filters is observed to be fairly insensitive to value changes.

The setting of the backscatter ratio bounds is more subjective however. As there is no true molecular measurement at Summit (for example provided by a Raman lidar or high spectral resolution lidar), the Klett inversion was used. Curry et al. (1996) note that clear air is uncommon in the Arctic. It has been the authors' experience that even the clearest days at Summit still have some amount of ice in the sky. The clearest day observed within May and June 2015 is used as a baseline to set the clear air threshold. The lowest possible measurements of backscattering ratio with acceptable SNR are in the single digits. Likewise, the threshold limits between aerosol or sub-visible clouds and clouds were set using an all sky camera. The thinnest visible cloud layer observed during the same time period was used to separate the aerosol or sub-visible clouds and cloud masks. As the focus of this work is cloud microphysical properties, the sub-visible classification is lumped together with clear air for simplicity.

The threshold between liquid and ice,  $\delta = 0.11$ ,  $\delta_Q = 0.11$ , is taken from literature related to the Depolarization and Backscatter Unattended Lidar (DABUL), which was the predecessor to CAPABL, and not changed for this analysis. The same results related to saturation causing anomalously high depolarization ratio values causing a preference for ice over liquid in cloud observations is observed with lower limits of depolarization ratio. A depolarization ratio split of  $\delta = 0.11$ ,  $\delta_Q = 0.11$  is the most conservative case of this preference based on the literature values between  $0.03 \leq \delta \leq 0.11$ ,  $0.03 \leq \delta_Q \leq 0.11$  and is thus chosen. Lowering the threshold further virtually guarantees no liquid water observations in the PC and SCPC channels based on the information presented in Fig. 2.

### 4.3 Algorithm Example

An example of this data masking procedure is given in Fig. 3 for A detection and Fig. 4 for PC detection. This day is chosen because it contains both single level and two level mixed-phase cloud systems as well as high ice clouds. In comparing these two figures in the first 12 hours of the day, the mixed-phase cloud layer at approximately 1.5 km altitude has been identified with substantially more liquid ~~pixels~~ voxels when classified using A detection than using PC detection. Furthermore, there are two smaller mixed-phase cloud layers that exist below 1 km between 3 and 5 UTC and 8 to 11 UTC identified by analog detection, which are interpreted as purely ice when classified with PC observations. This interpretation error by PC observations is directly linked to high count rates causing saturation, which increases the observed depolarization ratio beyond the liquid ice threshold.

One other prominent feature observed especially in the ~~analog~~ A signals (Fig. 3), and to a lesser extent in the PC signals (Fig. 4) is multiple scattering. Multiple scattering is known to cause depolarization even within liquid-only clouds due to the possibility of multiple photon paths besides the assumed single backscattering approximation (Eloranta, 1998). When single scattering events are assumed, multiple scattering will produce higher depolarization ratio values that may be classified as ice when, in fact, the scattering volume may contain optically dense concentrations of liquid scatterers. This ultimately makes the tops of some water clouds appear like ice, which is clearly observed from 1 to 8 UTC. There are many techniques to deal with multiple scattering including multiple field of view lidar systems or post processing tools like those used by Shupe (2007),

which reclassify shallow ice layers identified at the top of mixed-phase or liquid-only layers as mixed phase or liquid. For this analysis, multiple scattering clearly skews some of the interpretations towards ice but as the signals from A, PC, and SCPC are all subject to the exact same detector signals, the effect is consistent across all 3 data sets. This results in a constant bias for all three detection methods but as the purpose of this paper is to examine differences between the data sets, multiple scattering is  
5 recognized for future work but not implemented in the masking scheme.

## 5 Observed Cloud Properties

Using the cloud and phase masks described above, monthly statistics are compiled. A single month example is given then multiple months are summarized. ~~Pixels-Voxels~~ are separated by cloud phase and clear air. ~~Pixels-Voxels~~ are integrated over the month-long period for each altitude and time bin. These altitude profiles are presented in Fig. 5 for July 2015, the first month  
10 of data available since the hardware updates described in Sect. 3. There is general disagreement in liquid identifications despite the data coming from the same photodetector. The only difference is the method used to handle the electrical signals within the lidar receiver and ~~it is exactly this choice that~~ this choice affects geophysical interpretation. The channel sensitivity can be seen in the ice panel where all lines trend together and with similar slope; analog detection is less sensitive than PC resulting in an offset of the profile values. Profiles for non-orthogonal and orthogonal data as well as PC and SCPC overlap well for  
15 clear air above approximately 3 km. Saturation correction at low count rates is akin to multiplying by unity thus resulting in overlapping results between PC and SCPC.

There is a dramatic underestimate of liquid water by CAPABL's PC acquisition, which worsens with decreasing altitude, shown in Fig. 5. At 1000 m, PC and A differ by 94% (PC observes 34 ~~pixels-voxels~~ of water over the month and analog observes 544). This difference is attributed to liquid ~~pixels-voxels~~ being mistaken for ice due to saturation in the PC ~~par~~  
20 parallel channel causing erroneously high depolarization ratio values. Below 2.5 km orthogonal and non-orthogonal results are nearly identical but above that altitude non-orthogonal polarization retrievals see more clear air and ice and have higher rates of effective sampling due to the stronger signals used. Recall the 3rd channel measurement is used in the non-orthogonal calculation, which is stronger than ~~perp-perpendicular~~ measurements and reduces the ~~detector-induced-polarization-induced~~  
dynamic range between the 3rd channel measurement and the ~~par-parallel~~ measurement allowing for greater ~~range-induced~~  
25 ~~dynamic range and, by extension, signal range~~ range coverage.

To demonstrate that July data is not anomalous, four months of available data from July 2, 2015 to October 31, 2015 are presented in Fig. 6. Over this time, the CAPABL system had an uptime of > 99% (this equates to approximately 5 minutes of missed data per day, which occurs at midnight UTC each day to perform system diagnostics and housekeeping). This figure illustrates any altitude biases in classifying the type of cloud or clear air while Fig. 5 illustrated the occurrence frequencies with  
30 height for each identifier. These data are compiled into box-and-whisker plots based on the profiles calculated for each month similar to those presented in Fig. 5. The median altitude of all ~~pixels-voxels~~ for each identifier: ice, liquid, and clear, is given as a line through the center of the box, which is completed by the 25th and 75 percentile of all monthly data. The whiskers extend to the 5th and 95th percentiles. The other data values are considered outliers.

Figure 6 indicates 3 prominent features. First, the median altitude of liquid ~~pixels-voxels~~ is not constant between A, PC, and SCPC. There is a clear 1 to 2 km offset in the medians between analog and photon counting (1.72 km, 1.43 km, 0.75 km, and 0.91 km offsets for July, August, September, and October, respectively). This offset in mean ~~pixel-voxel~~ height indicates that low-level, liquid clouds are often misclassified by the PC channel as indicated by Fig. 3 and Fig. 4, clearly demonstrating that saturation can change the geophysical interpretation of the polarimetric lidar signals and must be considered when ~~detector-induced~~ ~~polarization-induced~~ dynamic range is high, ~~for CAPABL this occurs approximately when  $\delta \leq 0.1$ . For CAPABL, this occurs when polarization-induced dynamic range is greater than approximately 1 order of magnitude.~~ The second feature is seen in the clear sky data where there is increased sensitivity of the PC channel over the analog channel and increased sensitivity of the non-orthogonal polarization retrievals over the orthogonal versions, as noted for the July histogram. This increased sensitivity is seen by the increase in whisker range of approximately 1 km (0.96 km, 0.70 km, 0.34 km, and 0.55 km for July, August, September, and October for SCPC to the 95th percentile, respectively, or 1.17 km, 1.12 km, 0.99 km, and 0.83 km to the inner fence) indicating the presence of more high altitude clear air ~~pixels-voxels~~ that pass the quality control standards specified in Table 2. As a result of the increased sensitivity, the median ~~of the~~ ~~altitude of the clear-sky~~ data shifts upwards as well (0.29 km, 0.29 km, 0.36 km, and 0.31 km for July, August, September, and October for SCPC, respectively). The final feature is the relative consistency of the occurrence of ice for all methods. The median altitude of the ~~ice-identified~~ data shifts slightly upwards again due to increased sensitivity between analog and photon counting (0.05 km, 0.23 km, 0.36 km, and 0.23 km for July, August, September, and October for SCPC and analog, respectively) but the boxes cover similar altitude ranges, especially for July. Comparing the whiskers for the non-orthogonal and orthogonal polarization retrievals within a month indicates that the increased sensitivity gained by using non-orthogonal polarization retrievals does not change the geophysical interpretation of the ~~ice-identified~~ data when saturation is of little concern (shifts of 0.26 km, 0.08 km, 0.21 km, and 0.10 km for July, August, September, and October for analog to the 95th percentile, respectively, or 0.18 km, 0.13 km, 0.21 km, and 0.18 km to the inner fence are observed), i.e. when signals are of similar strength or when signal rates are less than approximately 1 MHz.

## 6 Discussion

### 6.1 Selecting Dynamic Range

CAPABL is a single detector lidar system with signal sensitivities to four, sequentially scanned, polarization-planes. The polarization of the receiver is set using a LCVR in combination with a quarter wave plate to create a variable rotator. This design has proven robust and simple which is especially useful as the investigators have little access to the instrument throughout the year, due to the remoteness of Summit, Greenland. It does however require that the total signal dynamic range be set once a year. The range is set using a neutral density filter in the receiver to attenuate the signal. A neutral density of optical depth 3 is used to insure signals from clear air scattering do not exceed 10 MHz in the parallel polarization, the strongest signal. The receiver design is similar to a polarization sensitive micro-pulse lidar (MPL), described by Flynn et al. (2007), with a single fixed dynamic range but operating with linear polarizations only.

The LCVR voltages for CAPABL's 4 planes of linear polarization are set to provide evenly spaced signal intensities from clear air scatterers, not to the exact angle relative to the transmit polarization. The signal increments were made such that the polarizations for the 3rd and 4th channels were set to more evenly cover the signal range between the ~~par and perp~~ parallel and perpendicular polarizations. In clear air calibration tests, perpendicular signals were approximately 2 orders of magnitude less than parallel (~~detector-induced~~ polarization-induced dynamic range). The 3rd channel was set to be approximately a factor of 3 less than the parallel channel and the 4th channel approximately a factor of 8 less. This allows the ~~detector~~ polarization-induced dynamic range of interest to be selected based on the chosen polarization channel. For example, in a low-level liquid cloud, the three weakest signals can be used. For weaker scattering objects like clear air, aerosols, sub-visible cirrus clouds, or objects further in range, the three strongest signals are used. In clear air with a depolarization ratio of approximately 1%, the difference in ~~signal strength, detector-induced dynamic range, between par and perp~~ polarization-induced dynamic range between parallel and perpendicular is 2 orders of magnitude. Assuming 5 total orders of magnitude of linear operation for the specified counting system and a fixed preset dynamic range, this low depolarization ratio only allows the system to have a ~~range induced~~ range-induced dynamic range of approximately 3 orders of magnitude. From 50 m to 5 km, a range-induced dynamic range of 4 orders of magnitude is required. Using ~~par and perp~~ parallel and perpendicular channels makes this untenable but using non-orthogonal polarization channels reduces the ~~detector-induced~~ polarization-induced dynamic range by approximately a factor of 10 to 12 allowing for an extra order of magnitude fluctuation with range.

Using non-orthogonal polarization retrievals has extended the altitude range of CAPABL by as much as 1 to 1.5 km for clear air. Evidence of this increase can be seen in Fig. 5 where the total percent of ~~pixels-voxels~~ that pass the quality control process increase using non-orthogonal polarization retrievals. At Summit, where clouds rarely occur above 8 km ~~AGLagl~~ (Shupe et al., 2013), this equates to a 12.5% to 18.75% enhancement in effective sampling of the desired altitude range. Part 2 of this work will further quantify the advantages of non-orthogonal polarization retrievals by comparing the data availability for each processing type presented to a best estimate combination of all processing types.

## 6.2 Optimum Combination of Signals

~~The results of this work highlight the differences in signal dynamic range that propagate through the provided analysis altering the physical interpretation of the measurements made. While combining the measurements into the optimum combination of signals is beyond the scope of this work, it is useful to broadly understand the way to combine all the different signal approaches to best utilize the available data to extend the work started with CAPABL to different lidar systems. Two approaches are noteworthy. The first is to combine A and PC signals at the raw signal level to create a "glued" profile and to use the resulting profile in all retrievals. The second approach is to avoid "gluing" the profile together and to combine data masks after processing based on raw signal strengths and error estimates. The latter method is preferred in this analysis for a few primary reasons. First, it is unclear what quantity of error is introduced in the "gluing" procedure as it appears to be sensitive to background or noise sources and time. Further, the "gluing" procedure produces slightly different results based on the exact methodology. Implicit in the gluing procedure is the assumption that both photon counting and analog methods show linearity over some overlap signal strength. Therefore, there is a dynamic range where analog is clearly preferred and one where photon~~

counting is clearly preferred. The size of this overlap region is not well characterized but it is assumed to exist. Second, it is unclear what error would be introduced, if any, in using a section of a “glued” profile that results from analog detection and comparing it to a section resulting from photon counting. This could occur, for example, in a low-level cloud with low depolarization ratio yielding a weak perp signal and a strong par signal. Finally, it is clear when combining results from the second method (calculating separate masks) that the best signal to use is one that uses valid signals with the lowest error estimate. The procedure described in Sect. 4 defines valid signals, and the error estimates without “gluing” are much simpler to define and understand.

The method suggested by analysis of CAPABL’s data is to first process the data via orthogonal and non-orthogonal methods. The orthogonal is preferred where all signals are within the counting system’s linear range because only one polarization angle (either the 3rd or 4th channel) needs to be retrieved. Two angles are known and one is used introducing only 4 error sources (shot noise on 3 channels and the error of the retrieved angle). If one signal is either too strong or too weak, the non-orthogonal retrievals can increase the valid retrieval range by extending range-induced dynamic range by trading detector-induced dynamic range. There are 5 error sources (shot noise on 3 channels and the error of the two retrieved angles) and generally higher error estimates. Finally when adding in analog and photon counting, photon counting is preferred for low signal strengths but saturation correction typically has higher error than simply using analog detection. Putting all these findings together, in terms of range, non-orthogonal polarization retrievals with the weakest signals are used for the near range, orthogonal for mid ranges, and non-orthogonal polarization retrievals with the strongest three signals for far ranges are suggested by this analysis. In terms of signal strengths, the use of photon counting and analog signals are suggested while avoiding the saturation correction procedure altogether based on the additional error introduced with the uncertain model fit and the assumption stated above that there is a range of signal strengths where both photon counting and analog are valid yielding no requirement to extend the valid range of photon counting into the analog range.

## 6.2 Radiative Implications of Cloud Phase Misidentification

Cloud phase is shown to be an important driver of the radiation budget [in the Arctic](#) (Curry et al., 1996; Miller et al., 2015, 2017). For a constant amount of water, the liquid phase affects the radiative budget more strongly because it tends to form many small droplets with larger surface area where ice tends to form [fewer](#) larger crystals. As such, the optical depth and longwave [emission of liquid emissive flux by liquid clouds](#) is greater than of ice. At Summit, Miller et al. (2015) show that cloud radiative forcing is driven primarily by the annual variability in liquid bearing clouds. It is therefore important to assess [and optimize](#) the CAPABL data in terms of the [fractional](#) occurrence of liquid, ice, and clear air states.

Figure 7 gives the fractional occurrence of [pixel-voxel](#) types in the column above CAPABL. Profiles are defined from the ground to 15 km for a given time by the radiatively dominant [pixel-voxel](#) type, providing a vertically integrated snapshot of the profile above Summit. For example, if a profile contains liquid water, [ice, aerosol, and ice or](#) clear air, it is defined as liquid. Ice is defined as any column with ice [pixels in it but voxels in it](#) that lacks liquid. [Sub-visible columns must contain that pixel type without ice or liquid cloud pixels present.](#) Clear air columns must contain nothing but clear air. In this way, one can convert the [pixel-voxel](#) number defined in Fig. 6 to a cloud [fraction proxy fractional occurrence](#).

An examination of Fig. 7 suggests that all 6 processing types: A, PC, SCPC for both orthogonal and non-orthogonal, yield ~~similar fractional occurrence~~ fractional occurrence differences of clear air ~~pixels-voxels~~ (differences of ~~813%~~, ~~29%~~, ~~16%~~, ~~and 3~~ and ~~11%~~ for July, August, September, and October, respectively). This is due largely to the observational sensitivity of the separate channels, analog orthogonal is the least sensitive, i.e. misses the occurrence of high altitude clouds, and non-orthogonal photon counting is the most sensitive. Figure 7 also shows ~~a distinct difference in liquid and ice~~ an increase in that difference by a factor of approximately 3 in liquid column identification (differences of ~~3141%~~, ~~3531%~~, ~~2628%~~ and ~~2415%~~ for July, August, September, and October, respectively, for A and PC). This difference in liquid water cloud fraction can be used to approximate an error in cloud radiative forcing using the results from Fig. 7 from Miller et al. (2015). Using an ~~approximate~~ average difference of 30%, this time period of fractional occurrence of liquid clouds equates to an error in longwave cloud radiative forcing of approximately  $10 \text{ W}/m^2$ . Miller et al. (2015) finds an average of  $33 \text{ W}/m^2$  for cloud radiative forcing at Summit suggesting that using uncorrected CAPABL data to infer radiative impacts could under-represent forcing by as much as one third.

### 6.3 Identifying Saturation

One major finding from analysis of 5 years of CAPABL data is the sensitivity of the diattenuation measurement to saturation. One can see clearly in Fig. 4 that the areas identified as having erroneous depolarization measurements have diattenuation values,  $D_1 \cdot D_2$  in excess of -0.05. The combined diattenuation product, described in Sect. 4.1 and Table 2 in step 10, can distinguish between preferential orientation and saturation. For the 4 month data period examined, voxels identified as ice by photon counting and liquid by analog detection have an average diattenuation combination,  $D_1 \cdot D_2$ , of -0.08 or an average value  $|D_1| = |D_2| = 0.28$ . This is a result of an over constraint on the retrieval of 3 polarization properties,  $F_{11}$ ,  $F_{12}$ , and  $F_{33}$ , with 4 polarization channels. With this diattenuation combination, CAPABL is able to self analyze data that is erroneous due to the counting system's inability to linearly measure all polarizations. This identification is not possible with a polarimetric lidar with 2 channels without additional information.

### 6.4 Recognized Future Work

For certain designs, consideration of the signal dynamic range may be as important as the selection of polarization planes. The same problems related to dynamic range that are demonstrated for CAPABL ~~could exist in a one detector design~~ likely exist in other one detector designs, like the polarization sensitive MPL, because the ~~perpendicular and circular polarizations~~ polarization signals can still vary by as much as two orders of magnitude ~~in detector induced~~ due to polarization-induced dynamic range for very low depolarization ratio targets like liquid-only clouds, mixed-phase clouds, and clear air. More work is suggested to determine the possible errors in single detector designs as they are often designed to use orthogonal polarizations, which have ~~vary different dynamic ranges~~ large polarization-induced dynamic ranges for liquid clouds and clear air.

One of the major topics to discuss is the handling of multiple scattering. Multiple scattering tends to increase signal strength but is important primarily within regions of high optical thickness. Even with scatterers that are purely spherical, multiple scattering can cause signal depolarization. In the CAPABL data set, this is most noticed in the middle and top of low-level

liquid-only and mixed-phase clouds. The focus of this paper has been differences caused by count rate and signal strengths. In regions of multiple scattering, signal count rates tend to be low due to attenuation of signal. There is an increased proportion of signal in the ~~perp~~perpendicular polarization even though the overall signal is being attenuated through the region. However, as all signals used come from the same volume and time via the same detector signals, the result is a bias in all channels. There is no bias that manifests itself in only one channel, indicating that the differences observed between A, PC, and SCPC for both orthogonal and non-orthogonal retrievals must be due to other effects. The effect of multiple scattering is ~~suggested for future work to further refine the measurement capabilities of CAPABL.~~addressed further in Part 2 of this work.

~~One major finding from analysis of 5 years of CAPABL data is the sensitivity of the diattenuation measurement to saturation. One can see clearly in Fig. 4 that the areas identified as having erroneous depolarization measurements have diattenuation values in excess of 0.4. The combined diattenuation product, described in Sect. 4.1 and Table 2 in step 10, can distinguish between preferential orientation and saturation. This finding was used manually and not operationally within this work but will be included in future retrieval versions to enhance the quality of the retrieval. For systems that have the ability to measure more than 2 independent polarization channels, diattenuation is found to be a sensitive measure of retrieval validity.~~

## 7 Conclusions

Ground based measurements of cloud properties are critically needed in the polar regions to help improve modeling studies of major weather and climate processes (Curry et al., 1996; Shupe et al., 2013). A particular need is to identify and distinguish cloud liquid water from ice as their roles in the radiative balance of the polar regions are distinctively different (Miller et al., 2015, 2017). This paper has highlighted the challenges in identifying liquid-only and mixed-phase clouds by polarimetric lidar observations, and the utility of employing multiple polarization planes to cover the necessary signal dynamic range, or equivalently ~~to~~ cover the diversity of signals introduced by the variety of cloud types and altitudes. The estimate of the lidar depolarization ratio, which has been often correlated to cloud phase, is dependent not only on the differential intensity in the polarized signal caused by the observed scattering process but the lidar count rate ~~observed as well~~. Lidar count rates are related, as seen via the Stokes vector lidar equation, to cloud optical depth, observation range, and the response of the photodetector and counting system. These additional dependencies cause biases in lidar data as the signal dynamic range changes significantly causing the strongest polarization signals to saturate, ~~which.~~ This saturation manifests in non-physical increases in the lidar depolarization ratio. This directly biases the interpretation of observations to preferentially identify ice over liquid water. The predominantly low-lying and optically thick nature of liquid clouds over Summit, Greenland, relative to ice clouds, result in very strong signal diversity that must be treated in order to properly identify and classify cloud types by lidar.

This work has demonstrated three key points. The first point is that cloud phase classification by polarimetric lidar is sensitive not only to the cloud phase but other cloud macrophysical properties such as base height (or range) and optical depth ~~and~~ to lidar design properties such as ~~the power aperture product, field of view, receiver polarization,~~ receiver polarization and detection schemes through saturation effects on receiver count rates. The second point is that this associated signal diversity in the lidar observations ~~must can~~ be recognized in order to flag conditions ~~unsuitable either unsuitable or optimal~~ for determining



cloud phase ~~an inherent problem in two-channel polarization lidars~~ using third and fourth polarization channels, and exploiting the sensitivity of diattenuation to saturation. In high dynamic range targets, like optically thick liquid-only or mixed-phase clouds, ~~such requirements systematic errors~~ can cause a misrepresentation of liquid clouds as ice clouds. Here this is shown to occur on the order of 30%-40% of the time for CAPABL but is correctable using the presented novel polarization scheme. The

5 final point is that by employing multiple planes of polarization in the lidar receiver, in the case of CAPABL four linear planes, the diversity in backscattered intensity may be handled more judiciously making the characterization of cloud types more accountable. This effectively spreads the required dynamic range of signals among the multiple polarization measurements. Furthermore, the signal dynamic range in each polarization is extended by incorporating both analog and photon counting capabilities. This polarization configuration and signal combination allows the CAPABL system to self analyze limitations in

10 a ~~channels~~ channel's performance, correct some of the behavior, and optimize the use of the different channels for different cloud scattering conditions.

A case study of 4 months of data from the CAPABL system at Summit, Greenland is shown to demonstrate how signal saturation issues in certain polarization channels can be identified and directly linked to geophysical retrieval errors. For example, the difference in the estimate of the median height for liquid clouds is shown to differ by as much as 2 km between

15 analog and photon counting detection because of photon-counting detection misidentifying the presence of low-lying liquid clouds as ice. This also yields a difference of approximately 30% in estimates of fractional occurrence of liquid clouds. It is further demonstrated that the sensitivity of a polarization lidar system can be enhanced while simultaneously reducing the required system dynamic range by using non-orthogonal polarization measurements. The range of effectively sampled atmospheric measurements can be extended by as much as 18%, or equivalently 1.5 km, using non-orthogonal polarization

20 measurement.

~~While this paper This work~~ has analyzed the ~~biases introduced into CAPABL's lidar data due to counting non-linearity, future work could certainly improve data quality. As highlighted in Sect. 4 and 6, more work to remove the systematic bias caused by multiple scattering is needed. This data could also be used in a more sophisticated method by leveraging more~~ limitations and benefits of the orthogonal and non-orthogonal polarization measurements possible with CAPABL. Part 2 of

25 this work will combine all of these differences into a single best estimate lidar cloud product and validate it by leveraging co-located ~~measurements such as that presented by . In particular, CAPABL's observations could be combined with collocated remote sensing instrumentation, namely a co-located MPL, microwave radiometer, and radar Doppler spectra to more precisely~~ classify cloud pixels as possible mixed-phase clouds, while also addressing the inherent ice bias in all polarized signals due to multiple scattering single polarization Doppler radar. This work has also demonstrated that lidar phase classification errors

30 can theoretically alter the interpretation of longwave cloud radiative effect on the order of 10 W/m<sup>2</sup> based on fractional occurrence. Part 2 of this work will compare the best estimate lidar cloud product to co-located broadband radiation measurements to further quantitatively assess these errors.



## 8 Data Availability

All data collected by the ICECAPS program is publicly available at: [anonymous@ftp1.esrl.noaa.gov/psd3/arctic/summit/](mailto:anonymous@ftp1.esrl.noaa.gov/psd3/arctic/summit/).

## 9 Code Availability

The code developed to process the CAPABL data is available by request from the authors.

- 5 *Author contributions.* ~~R. Stillwell prepared the manuscript with contributions from all co-authors. The CAPABL instrument was re-deployed~~  
to the ICECAPS program, for which M. Shupe (MS) is a project PI, at Summit, Greenland by R. Stillwell (RS), R. Neely (RN), and M. O'Neill  
(MO). RS developed the non-orthogonal generalization of the polarization measurements, defined the classification algorithm bounds, and  
performed the data analysis with theoretical input from J. Thayer (JT). JT and RN served as advisors for RS for CAPABL specific technical  
tasks and MS and RN contributed scientific context. The CAPABL instrument is maintained by technicians from Polar Field services in close  
10 coordination with RS, RN, and MS. RS prepared the manuscript with contributions from RN, JT, MS, and MO.

- Acknowledgements.* This material is based upon work supported by the National Science Foundation Graduate Research Fellowship Program  
under grant No. DGE 1144083 and National Science Foundation grants No. AON 1303864, PLR-1303864, PLR-1303879, PLR-1314156,  
and ATM-0454999. Ryan Neely is funded by the National Centre for Atmospheric Science. The authors would like to thank the staff and  
science technicians at Summit, [especially Hannah James and Samuel Dorsi](#), as well as Polar Field Services for their support and dedication  
15 to help collect [data](#) and maintain instrumentation.

## Appendix A: CAPABL's Nonlinear Photon Counting

- CAPABL's photon counting system is subject to pulse pileup, as is the case with most photon counting systems. This pileup results in detector  
pulses occurring too close in time for the counting system to uniquely identify individual pulses, resulting in systematic underrepresentation  
of photon count rate. The models introduced to correct this problem are based on the work of Donovan et al. (1993); Whiteman (2003); Liu  
20 et al. (2009) using a calibration data set taken during a clean air period at Summit in May 2015. The neutral-density filter was removed from  
the receiver optical path on a clear air day to increase the observed count rate and also extend the vertical range of calibration data. Data were  
concatenated based on the work of Newsom et al. (2009) with the main difference being that profiles were background subtracted before  
analysis (note that this is the only case in this manuscript where such concatenation is performed). From these data, the analog profile is taken  
as the ideal count rate. These data are plotted in Fig. 8 with two correction methods fit to the data using a Levenberg-Marquardt nonlinear  
25 least squares solver. These saturation models are given as

$$S_{obs} = \frac{S_0}{1 + \tau_{NP} S_0} \quad (A1)$$

and

$$S_{obs} = S_0 \exp(\tau_P S_0) \quad (A2)$$

referred to as non-paralyzable and paralyzable, respectively. The fit parameter for non-paralyzable is the deadtime  $\tau_{NP}$  and for paralyzable  $\tau_P$ .

To convert from the observed photon count number to observed photon count rate, the simple linear transformation

$$N_{obs} = S_{obs} \times S_{PP} \times T_{PB} \quad (A3)$$

- 5 is used where  $N_{obs}$  is the observed photon count number per bin,  $S_{obs}$  is the observed photon count rate per shot,  $S_{PP}$  is the number of laser shots integrated per profile, and  $T_{PB}$  is the two way travel time of light per range bin.

Inserting Eq. A3 into Eq. A1 and performing a propagation of error analysis, based on Taylor series expansion for standard error propagation assuming no data covariance, yields the shot noise error for the corrected photon count number per bin given as

$$\sigma_N = S_{PP} T_{PB} \sqrt{\frac{N_{obs}^4 \sigma_{\tau_{NP}}^2 + S_{PP}^2 T_{PB}^2 \sigma_{N_{obs}}^2}{(S_{PP} T_{PB} - \tau_{NP} N_{obs})^4}}. \quad (A4)$$

- 10 Equation A4 indicates that the error in corrected photon count rate is a function of the count error  $\sigma_{N_{obs}}$  which conform to Poisson statistics and the error in the model fit parameter  $\tau_{NP}$ . This error is estimated during the fitting procedure using the fit confidence bounds. Note that if and only if  $\tau_{NP}$  is exactly zero (i.e.  $\tau_{NP} = 0$  and  $\sigma_{\tau_{NP}} = 0$ ) will the counting error be simply  $\sigma_{N_{obs}}$ .

- The calibration data used for this analysis is presented in Fig. 8 where the fitting regions are 0.1  $MHz$  to 500  $MHz$ . As each measurement is subject to some measurement error, Poisson counting error for photon counting and electrical noise for the analog detection, this fit was  
15 calculated using the signal to noise ratio (SNR) as a data weight such that higher SNR data are given higher weights. The results of this weighted analysis indicate that the dead time is approximately 0.1  $[ns]$  higher than the unweighted analysis which ignores measurement errors in the fit.

## References

- Bennartz, R., Shupe, M. D., Turner, D. D., Walden, V. P., Steffen, K., Cox, C. J., Kulie, M. S., Miller, N. B., and Pettersen, C.: July 2012 Greenland melt extent enhanced by low-level liquid clouds, *Nature*, 496, 83–86, <http://dx.doi.org/10.1038/nature12002>, 2013.
- Bohren, C. F. and Clothiaux, E. E.: *Fundamentals of Atmospheric Radiation*, WILEY-VCH Verlag GmbH and Co. KGaA, Weinheim, Germany, 2005.
- Bohren, C. F. and Huffman, D. R.: *Absorption and Scattering of Light by Small Particles*, WILEY-VCH Verlag GmbH and Co. KGaA, 1998.
- Cesana, G., Kay, J. E., Chepfer, H., English, J. M., and de Boer, G.: Ubiquitous low-level liquid-containing Arctic clouds: New observations and climate model constraints from CALIPSO-GOCCP, *Geophysical Research Letters*, 39, n/a–n/a, doi:10.1029/2012GL053385, <http://dx.doi.org/10.1029/2012GL053385>, l20804, 2012.
- Curry, J. A., Schramm, J. L., Rossow, W. B., and Randall, D.: Overview of Arctic Cloud and Radiation Characteristics, *Journal of Climate*, 9, 1731–1764, doi:10.1175/1520-0442(1996)009<1731:OOACAR>2.0.CO;2, [http://dx.doi.org/10.1175/1520-0442\(1996\)009<1731:OOACAR>2.0.CO;2](http://dx.doi.org/10.1175/1520-0442(1996)009<1731:OOACAR>2.0.CO;2), 1996.
- de Boer, G., Eloranta, E. W., and Shupe, M. D.: Arctic Mixed-Phase Stratiform Cloud Properties from Multiple Years of Surface-Based Measurements at Two High-Latitude Locations, *Journal of the Atmospheric Sciences*, 66, 2874–2887, doi:10.1175/2009JAS3029.1, <http://dx.doi.org/10.1175/2009JAS3029.1>, 2009.
- Di, H., Hua, H., Cui, Y., Hua, D., Li, B., and Song, Y.: Correction technology of a polarization lidar with a complex optical system, *J. Opt. Soc. Am. A*, 33, 1488–1494, doi:10.1364/JOSAA.33.001488, <http://josaa.osa.org/abstract.cfm?URI=josaa-33-8-1488>, 2016.
- Donovan, D. P., Whiteway, J. A., and Carswell, A. I.: Correction for nonlinear photon-counting effects in lidar systems, *Appl Opt*, 32, 6742–53, 1993.
- Eloranta, E. W.: Practical model for the calculation of multiply scattered lidar returns, *Appl. Opt.*, 37, 2464–2472, doi:10.1364/AO.37.002464, <http://ao.osa.org/abstract.cfm?URI=ao-37-12-2464>, 1998.
- Flynn, C. J., Mendoza, A., Zheng, Y., and Mathur, S.: Novel polarization-sensitive micropulse lidar measurement technique, *Opt. Express*, 15, 2785–2790, doi:10.1364/OE.15.002785, <http://www.opticsexpress.org/abstract.cfm?URI=oe-15-6-2785>, 2007.
- Freudenthaler, V., Esselborn, M., Wiegner, M., Heese, B., Tesche, M., Ansmann, A., Mueller, D., Althausen, D., Wirth, M., Fix, A., Ehret, G., Knippertz, P., Toledano, C., Gasteiger, J., Garhammer, M., and Seefeldner, M.: Depolarization ratio profiling at several wavelengths in pure Saharan dust during SAMUM 2006, *Tellus B*, 61, 165–179, doi:10.1111/j.1600-0889.2008.00396.x, <http://dx.doi.org/10.1111/j.1600-0889.2008.00396.x>, 2009.
- Fujii, T. and Fukuchi, T., eds.: *Laser Remote Sensing*, Taylor and Francis Group, 2005.
- Gimmetstad, G. G.: Reexamination of depolarization in lidar measurements, *Appl. Opt.*, 47, 3795–3802, doi:10.1364/AO.47.003795, 2008.
- Goldsmith, J. E. M., Blair, F. H., Bisson, S. E., and Turner, D. D.: Turn-Key Raman Lidar for Profiling Atmospheric Water Vapor, Clouds, and Aerosols, *Appl. Opt.*, 37, 4979–4990, doi:10.1364/AO.37.004979, <http://ao.osa.org/abstract.cfm?URI=ao-37-21-4979>, 1998.
- Gregory, J. M., Huybrechts, P., and Raper, S. C. B.: Climatology: Threatened loss of the Greenland ice-sheet, *Nature*, 428, 616–616, <http://dx.doi.org/10.1038/428616a>, 2004.
- Groß, S., Freudenthaler, V., Wirth, M., and Weinzierl, B.: Towards an aerosol classification scheme for future EarthCARE lidar observations and implications for research needs, *Atmospheric Science Letters*, 16, 77–82, doi:10.1002/asl2.524, <http://dx.doi.org/10.1002/asl2.524>, 2015.

- Hansen, J., Sato, M., Kharecha, P., and von Schuckmann, K.: Earth's energy imbalance and implications, *Atmospheric Chemistry and Physics*, 11, 13 421–13 449, 2011.
- Hayman, M. and Thayer, J. P.: Explicit description of polarization coupling in lidar applications, *Opt Lett*, 34, 611–3, 2009.
- Hayman, M. and Thayer, J. P.: Lidar polarization measurements of {PMCs}, *Journal of Atmospheric and Solar-Terrestrial Physics*, 73, 2110–2117, doi:<http://dx.doi.org/10.1016/j.jastp.2010.08.007>, <http://www.sciencedirect.com/science/article/pii/S1364682610002403>, layered Phenomena in the Mesopause Region, 2011.
- Hayman, M. and Thayer, J. P.: General description of polarization in lidar using Stokes vectors and polar decomposition of Mueller matrices, *J Opt Soc Am A Opt Image Sci Vis*, 29, 400–9, 2012.
- Intrieri, J. M., Shupe, M. D., Uttal, T., and McCarty, B. J.: An annual cycle of Arctic cloud characteristics observed by radar and lidar at SHEBA, *Journal of Geophysical Research: Oceans*, 107, SHE 5–1–SHE 5–15, doi:10.1029/2000JC000423, <http://dx.doi.org/10.1029/2000JC000423>, 2002.
- Kaul, B. V., Samokhvalov, I. V., and Volkov, S. N.: Investigating Particle Orientation in Cirrus Clouds by Measuring Backscattering Phase Matrices with Lidar, *Appl. Opt.*, 43, 6620–6628, doi:10.1364/AO.43.006620, <http://ao.osa.org/abstract.cfm?URI=ao-43-36-6620>, 2004.
- Kay, J. E., Bourdages, L., Miller, N. B., Morrison, A., Yettella, V., Chepfer, H., and Eaton, B.: Evaluating and improving cloud phase in the Community Atmosphere Model version 5 using spaceborne lidar observations, *Journal of Geophysical Research: Atmospheres*, 121, 4162–4176, doi:10.1002/2015JD024699, <http://dx.doi.org/10.1002/2015JD024699>, 2015JD024699, 2016.
- Kjeldsen, K. K., Korsgaard, N. J., Bjørk, A. A., Khan, S. A., Box, J. E., Funder, S., Larsen, N. K., Bamber, J. L., Colgan, W., van den Broeke, M., Siggaard-Andersen, M.-L., Nuth, C., Schomacker, A., Andresen, C. S., Willerslev, E., and Kjær, K. H.: Spatial and temporal distribution of mass loss from the Greenland Ice Sheet since AD 1900, *Nature*, 528, 396–400, 2015.
- Klett, J. D.: Stable analytical inversion solution for processing lidar returns, *Appl. Opt.*, 20, 211–220, doi:10.1364/AO.20.000211, <http://ao.osa.org/abstract.cfm?URI=ao-20-2-211>, 1981.
- Liu, Z., Li, Z., Liu, B., and Li, R.: Analysis of saturation signal correction of the troposphere lidar, *Chinese Optics Letters*, pp. 1051–1054, 2009.
- Lu, S.-Y. and Chipman, R. A.: Interpretation of Mueller matrices based on polar decomposition, *J. Opt. Soc. Am. A*, 13, 1106–1113, doi:10.1364/JOSAA.13.001106, <http://josaa.osa.org/abstract.cfm?URI=josaa-13-5-1106>, 1996.
- Measures, R. M.: *Laser Remote Sensing: Fundamentals and Applications*, John Wiley and Sons, 6000 Broken Sound Parkway NW, Suite 300, Boca Raton, FL 33487-2742, USA, 1984.
- Miller, N. B., Shupe, M. D., Cox, C. J., Walden, V. P., Turner, D. D., and Steffen, K.: Cloud Radiative Forcing at Summit Greenland, *Journal of Climate*, 28, 6267–6280, 2015.
- Miller, N. B., Shupe, M. D., Cox, C. J., Noone, D., Persson, P. O. G., and Steffen, K.: Surface Energy Budget Responses to Radiative Forcing at Summit, Greenland, *The Cryosphere*, 11, 497–516, doi:10.5194/tc-11-497-2017, 2017.
- Mishchenko, M. I. and Hovenier, J. W.: Depolarization of light backscattered by randomly oriented nonspherical particles, *Opt. Lett.*, 20, 1356–1358, doi:10.1364/OL.20.001356, 1995.
- Morrison, H., de Boer, G., Feingold, G., Harrington, J., Shupe, M. D., and Sulia, K.: Resilience of persistent Arctic mixed-phase clouds, *Nature Geoscience*, 5, 11–17, <http://dx.doi.org/10.1038/ngeo1332>, 2012.
- Neely, R. R., Hayman, M., Stillwell, R. A., Thayer, J. P., Hardesty, R. M., O'Neill, M., Shupe, M. D., and Alvarez, C.: Polarization Lidar at Summit, Greenland for the Detection of Cloud Phase and Particle Orientation, *Journal of Atmospheric and Oceanic Technology*, 30, 1635–1655, doi:10.1175/JTECH-D-12-00101.1, <http://dx.doi.org/10.1175/JTECH-D-12-00101.1>, 2013.

- Newsom, R. K., Turner, D. D., Mielke, B., Clayton, M., Ferrare, R., and Sivaraman, C.: Simultaneous analog and photon counting detection for Raman lidar, *Appl. Opt.*, 48, 3903–3914, doi:10.1364/AO.48.003903, <http://ao.osa.org/abstract.cfm?URI=ao-48-20-3903>, 2009.
- Pithan, F., Medeiros, B., and Mauritsen, T.: Mixed-phase clouds cause climate model biases in Arctic wintertime temperature inversions, *Climate Dynamics*, 43, 289–303, doi:10.1007/s00382-013-1964-9, <http://dx.doi.org/10.1007/s00382-013-1964-9>, 2014.
- 5 Sassen, K.: The Polarization Lidar Technique for Cloud Research: A Review and Current Assessment, *Bulletin of the American Meteorological Society*, 72, 1848–1866, 1991.
- Schotland, R. M., Sassen, K., and Stone, R.: Observations by Lidar of Linear Depolarization Ratios for Hydrometeors, *Journal of Applied Meteorology*, 10, 1011–1017, doi:10.1175/1520-0450(1971)010<1011:OBLOLD>2.0.CO;2, [http://dx.doi.org/10.1175/1520-0450\(1971\)010<1011:OBLOLD>2.0.CO;2](http://dx.doi.org/10.1175/1520-0450(1971)010<1011:OBLOLD>2.0.CO;2), 1971.
- 10 Sherwood, S. C., Bony, S., and Dufresne, J.-L.: Spread in model climate sensitivity traced to atmospheric convective mixing, *Nature*, 505, 37–42, 2014.
- Shupe, M. D.: A ground-based multisensor cloud phase classifier, *Geophysical Research Letters*, 34, n/a–n/a, doi:10.1029/2007GL031008, <http://dx.doi.org/10.1029/2007GL031008>, l22809, 2007.
- Shupe, M. D.: Clouds at Arctic Atmospheric Observatories. Part II: Thermodynamic Phase Characteristics, *Journal of Applied Meteorology and Climatology*, 50, 645–661, doi:10.1175/2010JAMC2468.1, <http://dx.doi.org/10.1175/2010JAMC2468.1>, 2011.
- 15 Shupe, M. D., Matrosov, S. Y., and Uttal, T.: Arctic Mixed-Phase Cloud Properties Derived from Surface-Based Sensors at SHEBA, *Journal of the Atmospheric Sciences*, 63, 697–711, doi:10.1175/JAS3659.1, <http://dx.doi.org/10.1175/JAS3659.1>, 2006.
- Shupe, M. D., Daniel, J. S., de Boer, G., Eloranta, E. W., Kollias, P., Luke, E. P., Long, C. N., Turner, D. D., and Verlinde, J.: A Focus On Mixed-Phase Clouds, *Bulletin of the American Meteorological Society*, 89, 1549–1562, 2008.
- 20 Shupe, M. D., Walden, V. P., Eloranta, E., Uttal, T., Campbell, J. R., Starkweather, S. M., and Shiobara, M.: Clouds at Arctic Atmospheric Observatories. Part I: Occurrence and Macrophysical Properties, *Journal of Applied Meteorology and Climatology*, 50, 626–644, doi:10.1175/2010JAMC2467.1, <http://dx.doi.org/10.1175/2010JAMC2467.1>, 2011.
- Shupe, M. D., Turner, D. D., Walden, V. P., Bennartz, R., Cadetdu, M. P., Castellani, B. B., Cox, C. J., Hudak, D. R., Kulie, M. S., Miller, N. B., Neely, R. R., Neff, W. D., and Rowe, P. M.: High and Dry: New Observations of Tropospheric and Cloud Properties above the
- 25 Greenland Ice Sheet, *Bulletin of the American Meteorological Society*, 94, 169–186, doi:10.1175/BAMS-D-11-00249.1, <http://dx.doi.org/10.1175/BAMS-D-11-00249.1>, 2013.
- Tan, I., Storelvmo, T., and Zelinka, M. D.: Observational constraints on mixed-phase clouds imply higher climate sensitivity, *Science*, 352, 224–227, 2016.
- Thomas, L., Cartwright, J. C., and Wareing, D. P.: Lidar observations of the horizontal orientation of ice crystals in cirrus clouds, *Tellus B*, 42, 211–216, doi:10.1034/j.1600-0889.1990.00001.x-i1, <http://dx.doi.org/10.1034/j.1600-0889.1990.00001.x-i1>, 1990.
- 30 Turner, D. D.: Arctic Mixed-Phase Cloud Properties from AERI Lidar Observations: Algorithm and Results from SHEBA, *Journal of Applied Meteorology*, 44, 427–444, doi:10.1175/JAM2208.1, <http://dx.doi.org/10.1175/JAM2208.1>, 2005.
- Van De Hulst, H.: *Light Scattering By Small Particles*, John Wiley and Sons, 1957.
- Van Tricht, K., Lhermitte, S., Lenaerts, J. T. M., Gorodetskaya, I. V., L’Ecuyer, T. S., Noel, B., van den Broeke, M. R., Turner, D. D., and
- 35 van Lipzig, N. P. M.: Clouds enhance Greenland ice sheet meltwater runoff, *Nat Commun*, 7, <http://dx.doi.org/10.1038/ncomms10266>, 2016.

- Verlinde, J., Rambukkange, M. P., Clothiaux, E. E., McFarquhar, G. M., and Eloranta, E. W.: Arctic multilayered, mixed-phase cloud processes revealed in millimeter-wave cloud radar Doppler spectra, *Journal of Geophysical Research: Atmospheres*, 118, 13,199–13,213, doi:10.1002/2013JD020183, <http://dx.doi.org/10.1002/2013JD020183>, 2013JD020183, 2013.
- Verlinde, J., Zak, B. D., Shupe, M. D., Ivey, M. D., and Stamnes, K.: The ARM North Slope of Alaska (NSA) Sites, *Meteorological Monographs*, 57, 8.1–8.13, doi:10.1175/AMSMONOGRAPHIS-D-15-0023.1, <http://dx.doi.org/10.1175/AMSMONOGRAPHIS-D-15-0023.1>, 2016.
- Weatkamp, C., ed.: *Lidar Range-Resolved Optical Remote Sensing of the Atmosphere*, vol. 102, Springer, 233 Spring Street, New York, NY 10013, USA, 2005.
- Whiteman, D. N.: Examination of the Traditional Raman Lidar Technique. I. Evaluating the Temperature-Dependent Lidar Equations, *Appl. Opt.*, 42, 2571–2592, doi:10.1364/AO.42.002571, <http://ao.osa.org/abstract.cfm?URI=ao-42-15-2571>, 2003.
- Whiteman, D. N., Melfi, S. H., and Ferrare, R. A.: Raman lidar system for the measurement of water vapor and aerosols in the Earth's atmosphere, *Appl. Opt.*, 31, 3068–3082, doi:10.1364/AO.31.003068, <http://ao.osa.org/abstract.cfm?URI=ao-31-16-3068>, 1992.
- Winker, D. M., Vaughan, M. A., Omar, A., Hu, Y., Powell, K. A., Liu, Z., Hunt, W. H., and Young, S. A.: Overview of the CALIPSO Mission and CALIOP Data Processing Algorithms, *Journal of Atmospheric and Oceanic Technology*, 26, 2310–2323, 2009.
- Yoshida, R., Okamoto, H., Hagihara, Y., and Ishimoto, H.: Global analysis of cloud phase and ice crystal orientation from Cloud-Aerosol Lidar and Infrared Pathfinder Satellite Observation (CALIPSO) data using attenuated backscattering and depolarization ratio, *Journal of Geophysical Research: Atmospheres*, 115, doi:10.1029/2009JD012334, <http://dx.doi.org/10.1029/2009JD012334>, 2010.

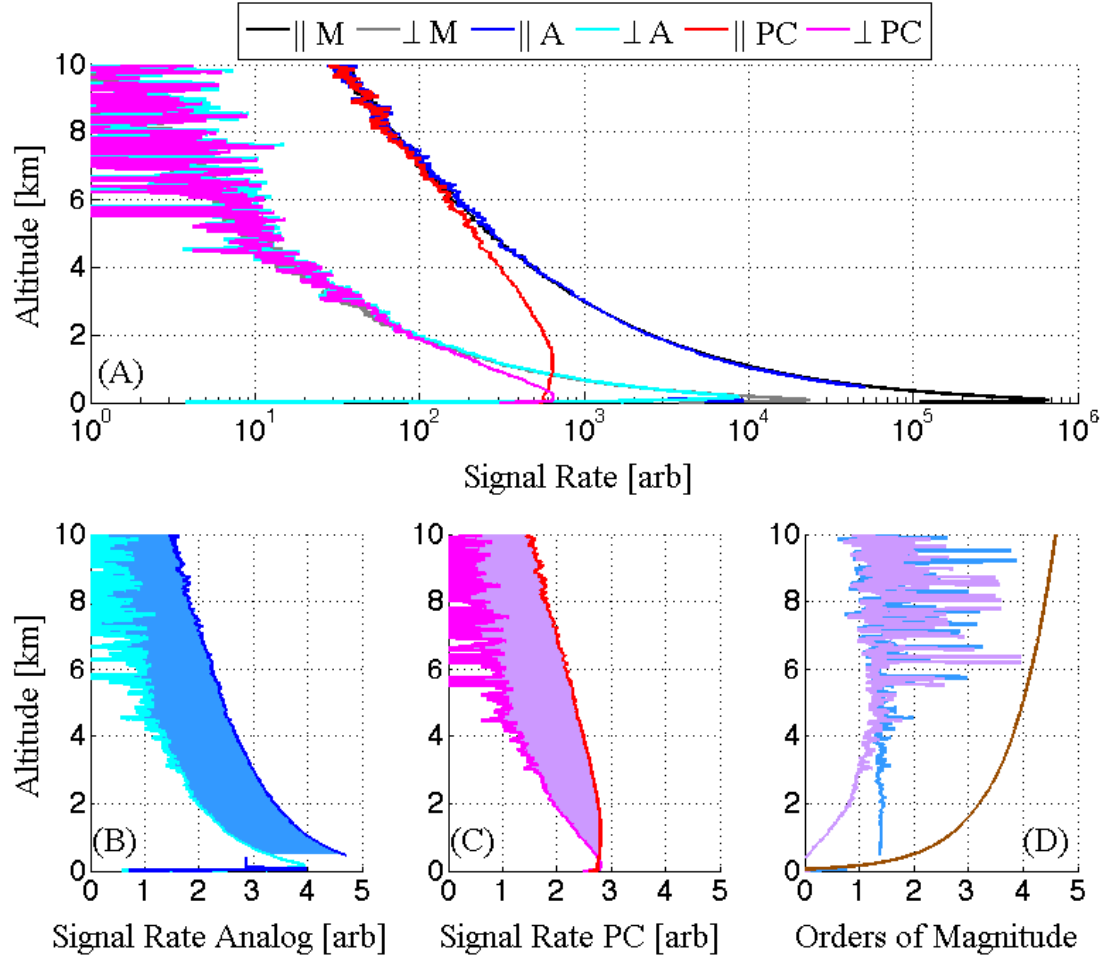

**Figure 1.** Measured and theoretical count profiles for the CAPABL system, panel (A). Measurements taken from May 26, 2015 are shown from the CAPABL system of its parallel ( $\phi = 45^\circ$  and  $\theta = 45^\circ$ ) and perpendicular ( $\phi = 45^\circ$  and  $\theta = -45^\circ$ ) polarization angles. Eq. 1 is used to model the same assuming a perfect measurement system, labeled M. Analog (A) and photon counting (PC) measurements are included to verify the validity of the modeled results. There is general disagreement of the modeled and photon counting data above signal rates of  $10^2 [arb]$  due to saturation and above  $10^{4.5} [arb]$  for analog due to pulse heights clipping the ~~analog-to-digital~~~~analog-to-digital~~ converter. Analog parallel and perpendicular signals are highlighted in panel (B) with the ~~detector-induced~~~~polarization-induced~~ dynamic range colored in light blue. Photon counting parallel and perpendicular signals are highlighted in panel (C) with the ~~detector-induced~~~~polarization-induced~~ dynamic range colored in pink. The ~~detector-induced~~~~polarization-induced~~ dynamic ranges are shown in panel (D) colored light blue for analog and pink for photon counting with range induced dynamic range, introduced by the  $R^2$  term in Eq. 1, referenced to  $50[m]$ , the theoretical and observed overlap distance, in brown. For reference, the total advertised linear dynamic range of the counting system used to make this measurement is 5 orders of magnitude.

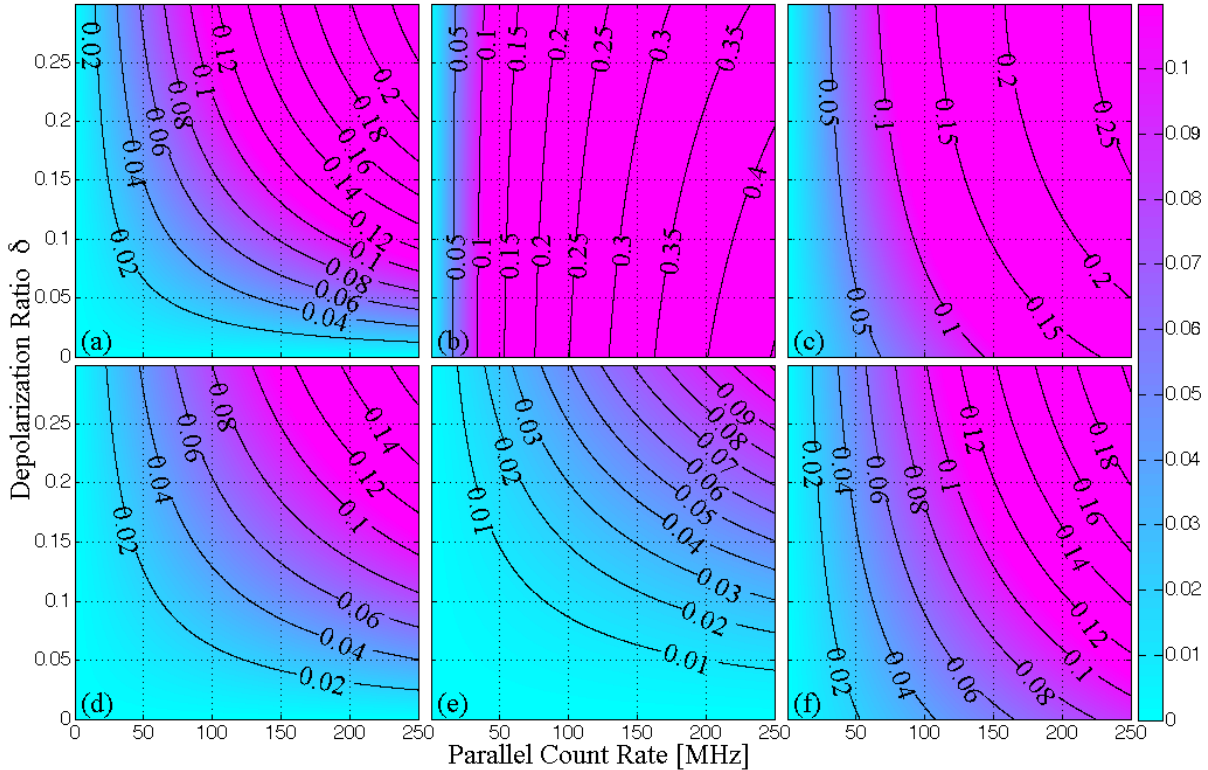

**Figure 2.** Theoretical deviation of the observed depolarization and the true depolarization ( $\delta_O - \delta$ ) as a function of the parallel count rate and the depolarization ratio ( $\delta$ ). The count rates for all CAPABL channel is calculated using Eq. 2 and the depolarization using Eq. 6. Assuming zero diattenuation, only two channels are required for the inversion. The channels used to calculated each contour are: a)  $\theta_1 = 0^\circ$  and  $\theta_2 = 90^\circ$  (traditional), b)  $\theta_1 = 0^\circ$  and  $\theta_2 = 45^\circ$ , c)  $\theta_1 = 0^\circ$  and  $\theta_2 = 110^\circ$ , d)  $\theta_1 = 90^\circ$  and  $\theta_2 = 45^\circ$ , e)  $\theta_1 = 90^\circ$  and  $\theta_2 = 110^\circ$ , and f)  $\theta_1 = 45^\circ$  and  $\theta_2 = 110^\circ$ . The results presented in this paper as orthogonal come from calculations similar to that given in panel a) and non orthogonal given in panel b). The color bar is scaled to match the adopted thresholds for liquid water,  $\delta = 0.11$  as defined by Intrieri et al. (2002); Shupe (2007).



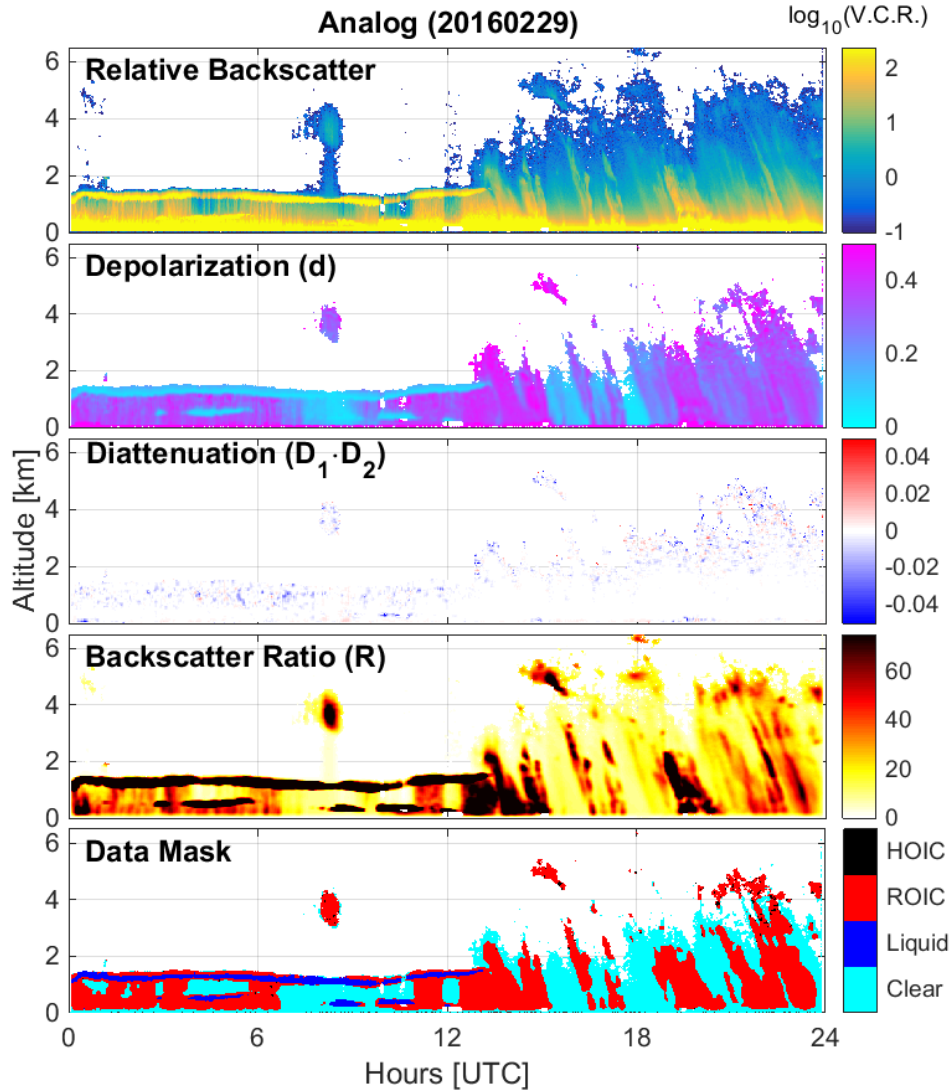

**Figure 3.** Analog data from the CAPABL system for February 29, 2016. Total Relative Backscatter is the summation of background subtracted parallel and perpendicular voltages converted to a virtual count rate (V.C.R.) using a data gluing procedure in MHz. The total backscatter color bar is given from 100 KHz to 250 MHz on a logarithmic scale. Depolarization is calculated as given in Eq. 6. Diattenuation is calculated as given in Eq. 7 and multiplied to  $D_1 D_2$ . Backscatter ratio is calculated by performing a Klett inversion and using ICECAPS radiosonde data (launched at 2400 UTC and 1200 UTC daily) to calculate a molecular extinction component (Klett, 1981). The data mask given is calculated as given by the rules described in Sect. 4. Liq., S.V., and Cl. stand for liquid, sub-visible, and clear, respectively.

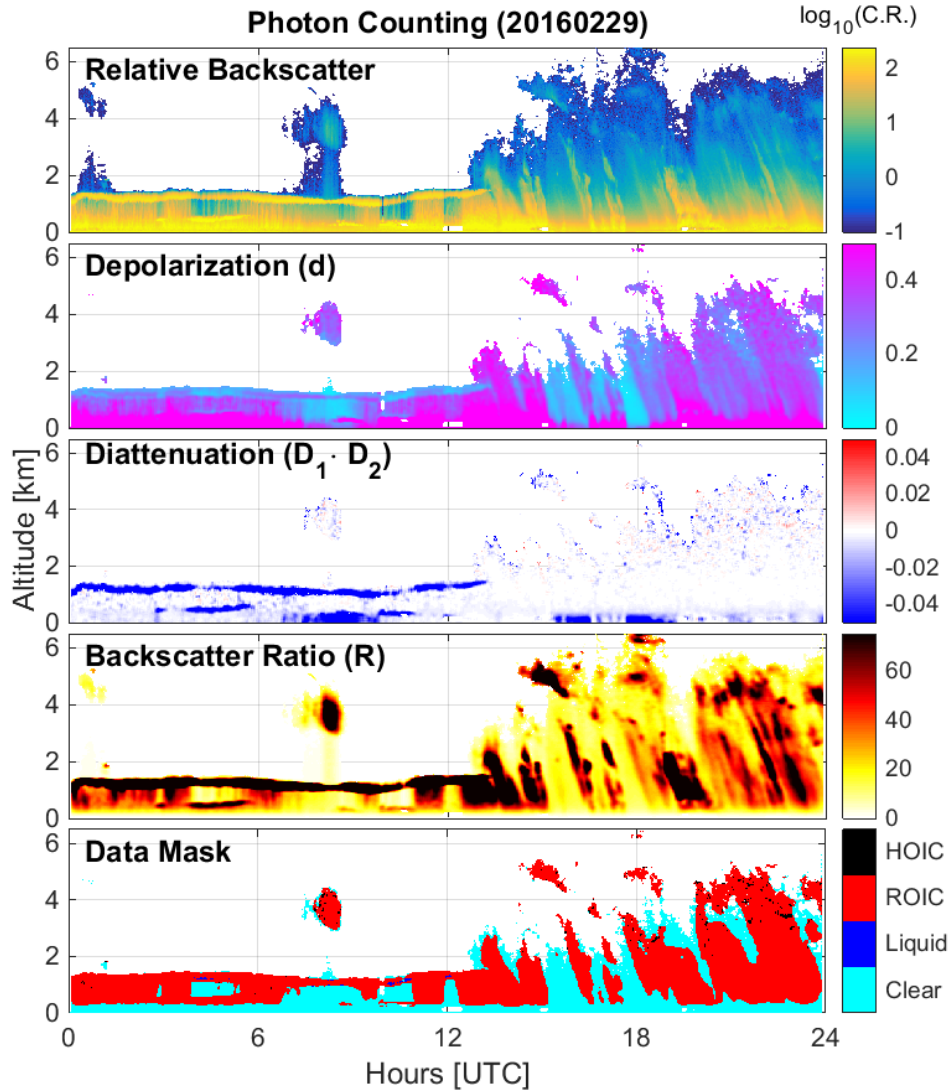

**Figure 4.** Photon Counting data from the CAPABL system for February 29, 2016. ~~Total~~ Relative Backscatter is the summation of background subtracted parallel and perpendicular photon counts converted to count rate (C.R.) in MHz. The total backscatter color bar is given from 100 KHz to 250 MHz on a logarithmic scale. Depolarization is calculated as given in Eq. 6. Diattenuation is calculated as given in Eq. 7 and multiplied to  $D_1 D_2$ . Backscatter ratio is calculated by performing a Klett inversion and using ICECAPS radiosonde data (launched at 2400 UTC and 1200 UTC daily) to calculate a molecular extinction component (Klett, 1981). The data mask given is calculated as given by the rules described in Sect. 4. ~~Liq., S.V., and Cl. stand for liquid, sub-visible, and clear, respectively.~~

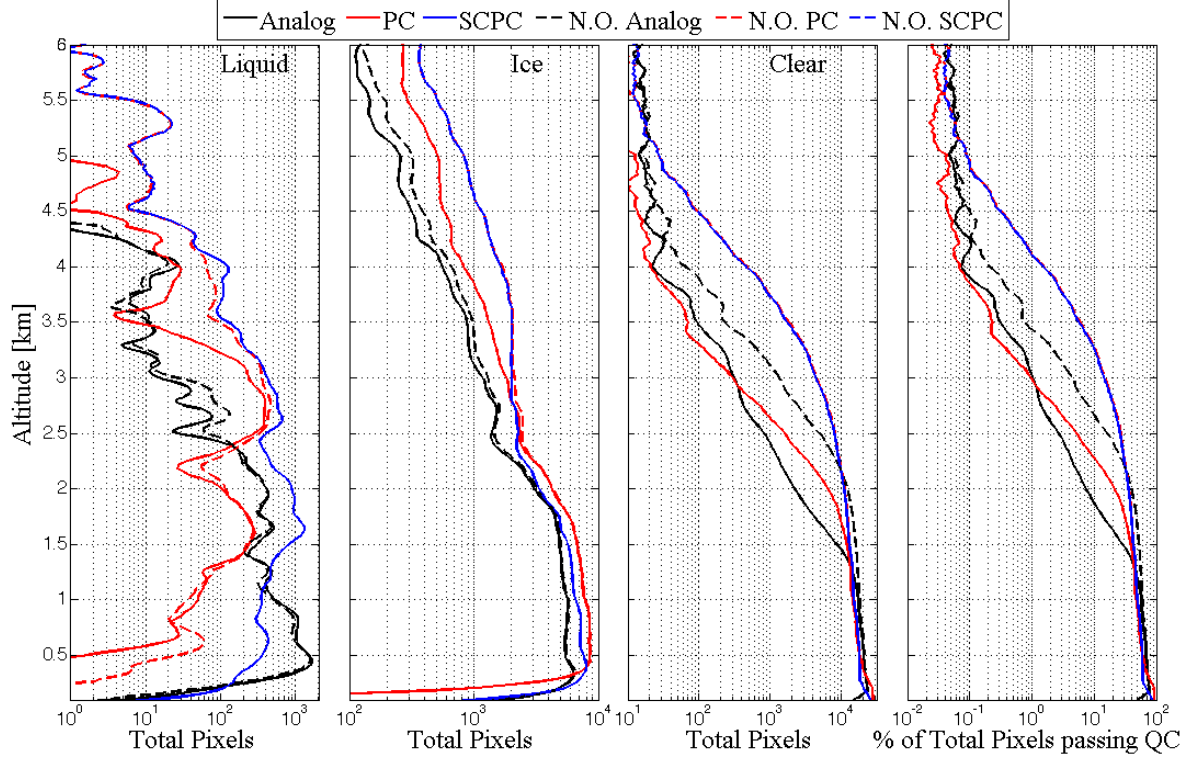

**Figure 5.** Histograms of all the monthly data collected in July, 2015. All pixels-voxels observed which pass the criteria described in Table 2 are included. The panels labeled Liquid, Ice, and Clear are summed pixels-voxels and the final panel without a labels is the percent of possible pixels-voxels observed. The legend descriptor N.O. indicates non-orthogonal calculation of polarization properties and those without indicate standard orthogonal calculation procedures. Note that the sensitivity of the channel is given quantitatively by how often measurements at a given height pass the criteria defined in Table 2. At altitudes above approximately 4 km, most pixels-voxels fail the SNR filter except cloud scenes and at altitudes below approximately 200 meters, some data is filtered because the analog detector signals exceed the range set for the analog to digital converter.

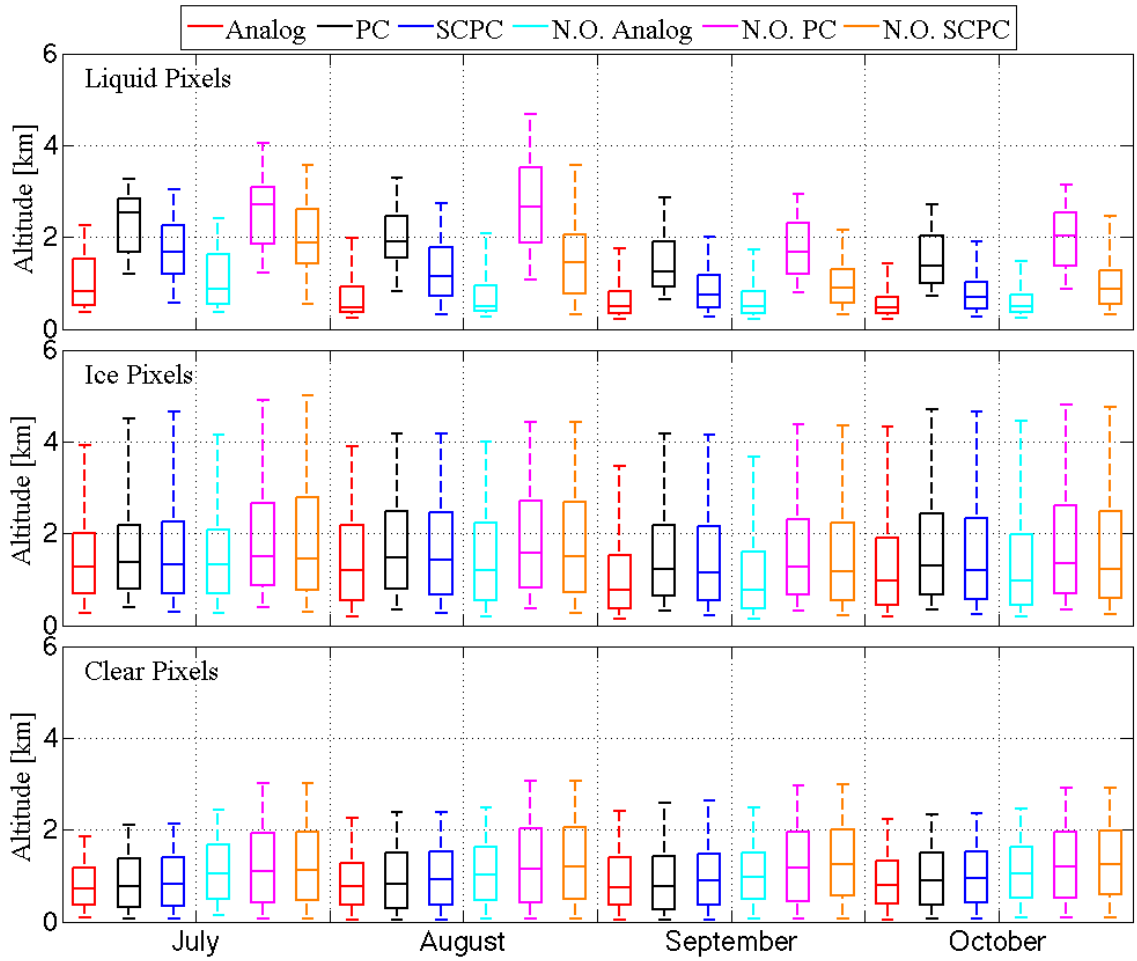

**Figure 6.** 4 months of CAPABL data binned into liquid, ice, or clear air. The median is indicated by a line through the box, the 25th to 75th percentile ranges complete the box and the whiskers extend to the 5th and 95th percentiles. The channel sensitivity can be seen looking at the clear ~~pixels~~ voxels where analog is expected to be less sensitive than PC and orthogonal less sensitive than non-orthogonal. Note also that there is a significant deviation in the median altitude for liquid water observed via PC and via analog detection.

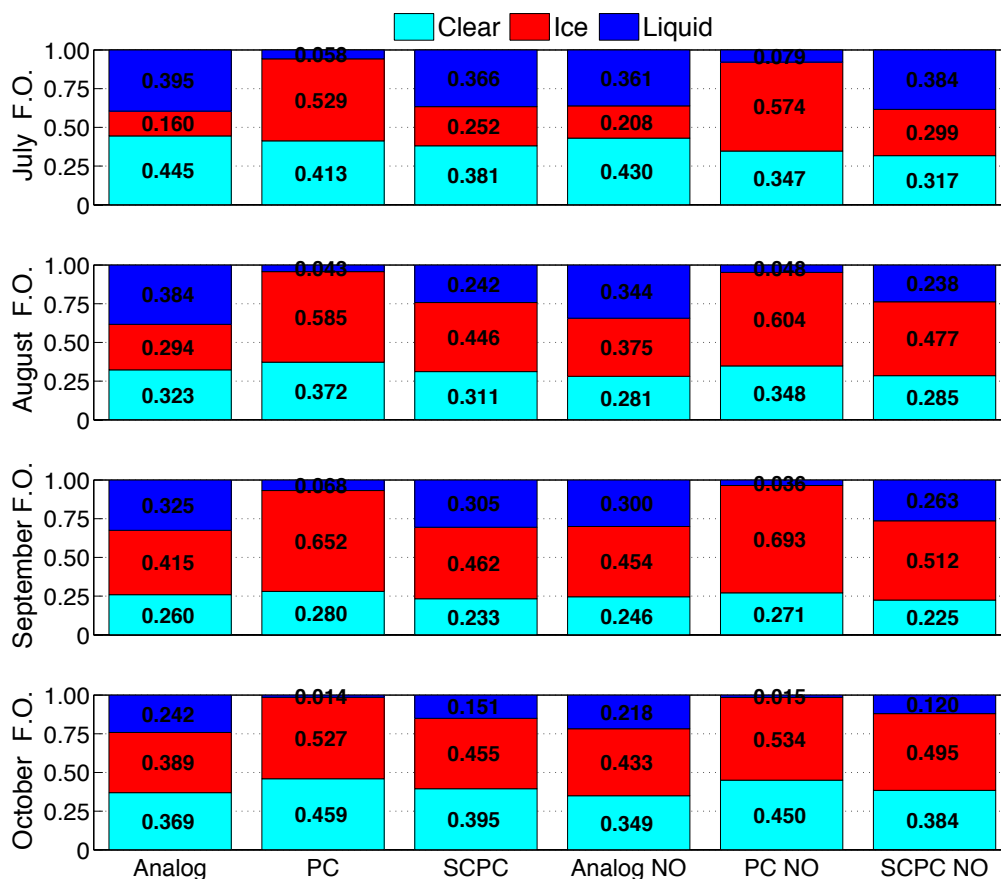

**Figure 7.** Fractional occurrence (F.O.) of each pixel-voxel type in the column for each month. To be labeled clear, the column must lack all sub-visible, ice, and water pixels/voxels. To be labeled sub-visible, the column must lack ice or water pixels. To be labeled as ice, a column must contain ice but lack water pixels/voxels. If a column contains a water pixel/voxel, the column is labeled as liquid. The fractional occurrences are given for each bar rounded to the nearest thousandth.

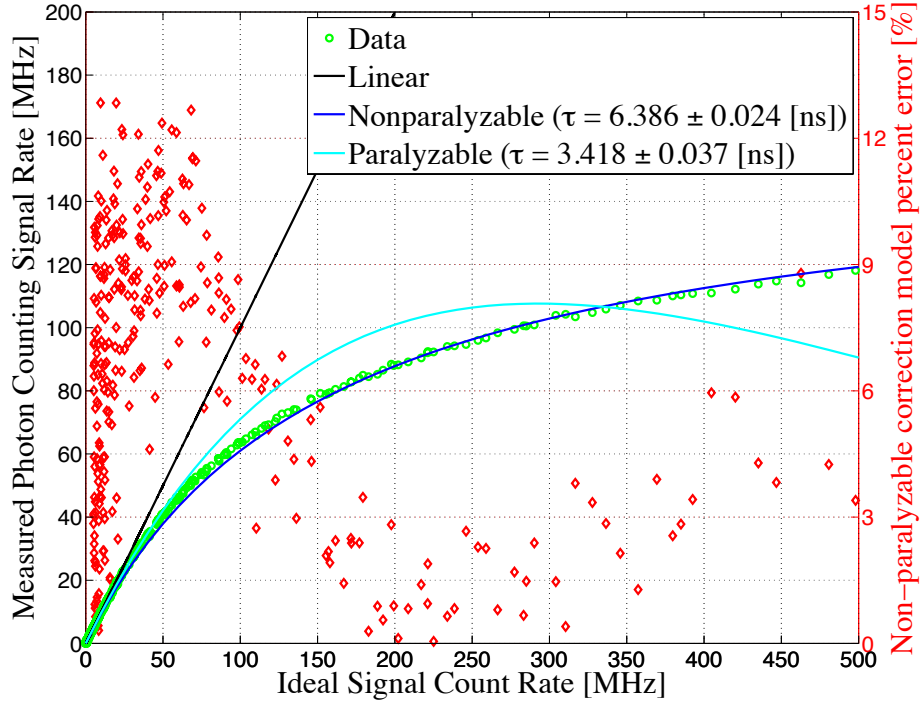

**Figure 8.** Saturation analysis of the CAPABL photon counting channel using the theory developed by Donovan et al. (1993); Whiteman (2003); Liu et al. (2009). The ideal signal count rate is found by normalizing the analog detection channel to the photon counting channel in a region where both are acting linearly which is about 500 kHz count rate. The measured count rate is then taken directly from photon counting measurements. The paralyzable and non-paralyzable models are then fit using a Levenberg-Marquardt weighted non-linear least squares fitting algorithm of the observed calibration data. The  $1\sigma$  confidence bound is given for each dead time fit parameter. Finally, the percent error of the correction model is given relative to the ideal count rate on the right ordinate as diamonds.

**Table 1.** CAPABL current system specifications. Note that polarization purity and polarization rejection are measured quantities. Polarization purity is measured with a 100,000:1 Glan-Taylor polarizer.

| Transmitter                                    | Receiver                          | Signal Processing                                  |
|------------------------------------------------|-----------------------------------|----------------------------------------------------|
| Big Sky Laser Ultra flashlamp<br>pumped Nd:YAG | Schmidt Cassegrain Telescope      | Combined Analog and Photon<br>Counting acquisition |
| Wavelength: 532.3 nm                           | Receiver Aperture: 20.8 cm        | Data system:                                       |
| Pulse Energy: 60 mJ                            | Filter Bandwidth: 0.3 nm          | Licel Transient Recorder TR20-12 Bit               |
| Pulse Rate: 15 Hz                              | Channels: 1                       | Range bin size: 7.5 m                              |
| Twin Head                                      | Field of View: 1.4 mrad           | Integration time: 5 sec                            |
| Polarization Purity: > 123 : 1                 | Polarization Rejection: > 800 : 1 | PMT: Hamamatsu R7400U-03                           |
|                                                | Linear Polarizations Observed: 4  |                                                    |

**Table 2.** A summary of the data processing steps taken to create the data masks desired for CAPABL. The processing for each data type: Analog (An), Photon Counting (PC), and Saturation Corrected Photon Counting (SCPC), is constant except where noted. Note that the diattenuation error equation is calculated per standard propagation of error techniques taking a Taylor series expansion of Equation 7.

|     | Processing Step                               | Channels | Details                                                                                                                                                                                                                                                                                                                |
|-----|-----------------------------------------------|----------|------------------------------------------------------------------------------------------------------------------------------------------------------------------------------------------------------------------------------------------------------------------------------------------------------------------------|
| 1)  | Time integration                              | An/PC    | To a constant 20 second resolution                                                                                                                                                                                                                                                                                     |
| 2)  | <del>Spaeial</del> <u>Spatial</u> integration | An/PC    | To a constant 30 meter resolution                                                                                                                                                                                                                                                                                      |
| 3)  | Saturation correction                         | PC       | Creates SCPC level                                                                                                                                                                                                                                                                                                     |
| 4)  | SNR filter                                    | All      |                                                                                                                                                                                                                                                                                                                        |
| 5)  | Speckle filter                                | All      | $5 \times 5$ surrounding box<br>$> 75\%$ data already removed = bad<br>$> 25\%$ data available = good                                                                                                                                                                                                                  |
| 6)  | Calculate polarization properties             | All      | Depolarization and depolarization ratio per Eq. 6 and 8<br>Depolarization and depolarization ratio error per error propagation of Eq. 6 and 8<br>Diattenuation per Eq. 7<br>Diattenuation error per error propagation of Eq. 7<br>Backscatter ratio ( $R$ ) per (Klett, 1981; Neely et al., 2013)                      |
| 7)  | Remove non-physical values                    | All      | Values outside <del><math>0 \leq \delta \leq 1</math></del> <u><math>0 \leq \delta_Q \leq 1</math></u><br>Values outside <del><math>0 \leq \sigma_\delta \leq 0.4</math></del> <u><math>0 \leq \sigma_{\delta_Q} \leq 0.4</math></u><br>Values outside $-1 \leq D \leq 1$<br>Values outside $0 \leq \sigma_D \leq 0.2$ |
| 8)  | Calculate base mask                           | All      | Clear: $1 \leq R < 26$<br>Aerosol: $26 \leq R < 50$<br>Cloud: $R \geq 50$                                                                                                                                                                                                                                              |
| 9)  | Calculate phase mask                          | All      | Liquid: cloud <del>pixels with <math>0 \leq \delta \leq 0.11</math></del> <u>voxels with <math>0 \leq \delta_Q \leq 0.11</math></u><br>Ice: cloud <del>pixels with <math>\delta &gt; 0.11</math></del> <u>voxels with <math>\delta_Q &gt; 0.11</math></u>                                                              |
| 10) | Calculate orientation mask                    | All      | Random: ice with $0 \leq D_1 D_2 \leq 0.01$<br>Preferential: ice with $D_1 D_2 \geq 0.01$ and $\sigma_D \leq 0.05$                                                                                                                                                                                                     |
